1 **- Research article -**

2 **Epidemiology of intestinal helminthiasis with an emphasis**  
3 **on taeniasis in the Chipata district of the Eastern province**  
4 **of Zambia**

5 Short title: Intestinal helminthiasis and taeniasis in the Eastern province  
6 of Zambia.

7 Gideon Zulu <sup>1,2\*</sup>, Chummy Sikasunge <sup>3</sup>, Tamara M. Welte <sup>4,5,6</sup>, Martin Simunza <sup>7</sup>,  
8 Dominik Stelzle <sup>4,6</sup>, Veronika Schmidt <sup>4,6</sup>, Alex Hachangu <sup>2</sup>, Wilbroad Mutale <sup>8</sup>,  
9 Maxwell Masuku <sup>2</sup>, Mwelwa Chembensofu <sup>3</sup>, Clarissa Prazeres da Costa <sup>6, 9, 10</sup>,  
10 Kabemba E. Mwape <sup>2</sup>, Andrea S. Winkler <sup>4,6,11#</sup> and Isaac K. Phiri <sup>2\*#</sup>

11 1. Ministry of Health, Government of the Republic of Zambia.

12 2. Department of Clinical Studies, School of Veterinary Medicine, University of Zambia,  
13 Lusaka, Zambia.

14 3. Department of Para-clinical Studies, School of Veterinary Medicine, University of Zambia,  
15 Lusaka, Zambia

16 4. Department of Neurology, School of Medicine, Technical University of Munich, Munich,  
17 Germany

18 5. Epilepsy Centre, Department of Neurology, University Hospital Erlangen, Erlangen,  
19 Germany

19 **NOTE:** This preprint reports new research that has not been certified by peer review and should not be used to guide clinical practice.

- 20 6. Centre for Global Health, School of Medicine, Technical University of Munich, Germany
- 21 7. Department of Disease Control, School of Veterinary Medicine, University of Zambia,  
22 Lusaka, Zambia.
- 23 8. Department of Public Health, School of Medicine, University of Zambia, Lusaka, Zambia.
- 24 9. German Centre for Infection Research,
- 25 10. Institute for Medical Microbiology, Immunology and Hygiene, School of Medicine,  
26 Technical University of Munich, Germany
- 27 11. Department of Community Medicine and Global Health, Institute of Health and Society,  
28 Faculty of Medicine, University of Oslo, Oslo, Norway.

29 \* Corresponding author.

30 E-mail: [gideonzulu@yahoo.com](mailto:gideonzulu@yahoo.com) (GZ)

31 # These authors contributed equally to this work.

## 32 Abstract

33 **Background:** Intestinal helminth infections are among the most common infections worldwide  
34 and have a negative impact on the health, education, nutrition and economic development of  
35 affected populations. This study aimed to estimate the prevalence of intestinal helminthiasis,  
36 including *T. solium* taeniasis, using a large-scale community-based study in the Chiparamba  
37 area of Chipata District of the Eastern province of Zambia.

38 **Methods/Principle Findings:** A cross-sectional study was conducted between June 2019 and  
39 December 2022 in a rural community of 25 randomly selected villages known to be at risk for

40 *T. solium* infection. Stool samples were examined for intestinal helminths using the formol-  
41 ether concentration technique and further tested for taeniasis by copro antigen-ELISA (copro  
42 Ag-ELISA). Descriptive statistical analyses were conducted, and associations between the  
43 disease prevalence of active infections and individual- and village-level variables were  
44 determined using the chi-square or Fisher's exact test. Predictors of an individual being positive  
45 for either taeniasis or other soil-transmitted helminths were determined using binary logistic  
46 regression. A total of 2762 stool samples were examined. One hundred ninety-five (7.1%)  
47 tested positive for at least one helminthic parasite on microscopy, with hookworm being the  
48 most frequent (84, 3.0%), followed by *S. mansoni* (66, 2.4%). For taeniasis, 11 (0.4%)  
49 participants were positive for *Taenia* spp. microscopically, while 241 (8.7%) tested positive  
50 via copro Ag-ELISA. On bivariate analysis, male sex was significantly associated with the  
51 prevalence of intestinal parasites ( $p = 0.012$ ) but not with that of taeniasis based on copro Ag-  
52 ELISA results. Village level differences were significant for infection with intestinal helminths  
53 as well as for taeniasis positivity on copro Ag-ELISA ( $p < 0.001$ ).

54 **Conclusion:** Intestinal helminths, including *T. solium* taeniasis, are prevalent in the  
55 Chiparamba area of the Chipata district in the eastern province of Zambia, supporting the clear  
56 need for further targeted public health interventions for surveillance and control.

## 57 Author summary

58 Intestinal helminth infections including schistosomiasis and *T. solium* are among the major  
59 neglected tropical diseases affecting communities with poor access to clean water, sanitation  
60 and hygiene. *T. solium* taeniasis is also associated with communities practicing free range pig  
61 management. These infections are common in Sub-Saharan Africa, South America, and Asia,  
62 where they negatively impact on the health, education, nutrition and economic development of

63 the affected population. Our study aimed to estimate the prevalence of intestinal helminthiasis,  
64 including *T. solium* taeniasis in the Chiparamba area of Chipata district of the Eastern province  
65 of Zambia. We found that 7.1% of the stool samples examined microscopically, were infected  
66 with at least one intestinal parasite. The most common parasites found were hookworm (3.0%)  
67 and *S. mansoni* (2.4%) while 0.4% were *Taenia* spp. We also found that 8.7% of the stool  
68 samples examined were positive for *Taenia* spp. antigens. Males were more associated with  
69 having intestinal parasites. Village level differences for infection with intestinal helminths as  
70 well as being positive for *Taenia* spp. antigens were also observed. The study shows that  
71 intestinal helminths including *T. solium* are present in our study community and require public  
72 health interventions for surveillance and control.

## 73 **Introduction**

74 Intestinal helminth infections are among the most common infections worldwide, with an  
75 estimated 1.5 million people infected globally [1]. These infections are common in Sub-  
76 Saharan Africa (SSA), South America, China and Asia and affect communities with poor  
77 access to clean water, sanitation and hygiene [1]. The most frequently found soil-transmitted  
78 helminths (STH) include hookworms, *Trichuris trichiura*, *Ascaris lumbricoides*, *Strongyloides*  
79 *stercoralis* and *Schistosoma* spp. These infections are of public health importance because of  
80 their negative impact on the health, education, nutrition and economic development of the  
81 affected population [2,3]. Intestinal helminth infections may result in malnutrition, iron-  
82 deficiency anaemia, and malabsorption. In addition, stunted growth and delays in cognitive  
83 development are frequent consequences of heavy intestinal helminth infection [4]. STH and  
84 *Schistosoma* spp. have therefore been targeted for control and eradication [5].

85 Schistosomiasis affects approximately 240 million people worldwide, and the majority of these  
86 people are found in sub-Saharan Africa, with more than 200 000 deaths per year. Humans that  
87 come into contact with bodies of water containing fresh water snails are at the highest risk of  
88 infection [6].

89 *Taenia solium* is another intestinal helminth that is known to have serious public health and  
90 economic impacts in low-income and middle-income countries (LMICs), particularly in  
91 communities where sanitation is poor, pigs are reared through the free-range system, and meat  
92 inspection is not practiced [7,8]. Humans and pigs are both affected by *T. solium* [9], and both  
93 may develop cysticercosis when they ingest *T. solium* eggs. Pigs acquire *T. solium* eggs mainly  
94 through consumption of human faeces from a *T. solium* tapeworm carrier, while humans  
95 become infected either directly through the faecal oral route (autoinfection) or indirectly  
96 through consumption of contaminated food or water. Humans develop tapeworm infection (*T.*  
97 *solium* taeniasis) when they consume raw or undercooked pork.

98 Although *T. solium* taeniasis has been recognized as a serious and emerging challenge to public  
99 health in Africa [5], there are limited data on its incidence and prevalence in most endemic  
100 areas due to a lack of adequate surveillance, monitoring and reporting systems [10,11]. Within  
101 Zambia, circulating antigens (Ag-ELISA) for porcine cysticercosis (PCC) were detected in  
102 15% to 34% of pigs in Eastern, Western and Southern provinces [8,12]. In the two districts  
103 Katete and Sinda of the Eastern province, prevalences of 46% and 68%, respectively, were  
104 detected in slaughter-aged pigs based on full carcass dissection [13]. Within the same province,  
105 human taeniasis prevalence based on copro Ag-ELISA was found to range from 6.3% to 12%  
106 [7,14]. Studies on intestinal helminths previously conducted in the Southern province of  
107 Zambia found prevalences of schistosomiasis and STH among adults of 13.9% and 12.1%,  
108 respectively [15]. Most studies on intestinal helminths in Zambia were conducted in children

109 [16–18]. Within the Eastern province, no studies have been performed to estimate the  
110 prevalence of intestinal helminths, including schistosomiasis, and previous studies on human  
111 *T. solium* infections were conducted with a small number of participants or villages. This study  
112 aimed to estimate the prevalence of intestinal helminths with a focus on taeniasis in a large-  
113 scale community-based study in the Chiparamba area of Chipata District.

## 114 **Materials and methods**

### 115 **Study site**

116 The study was conducted in the Chiparamba area of the Chipata district of the Eastern province  
117 of Zambia. Chiparamba is located approximately 50 km from the central business district of  
118 Chipata (Fig 1). The study was conducted between June 2019 and December 2022.

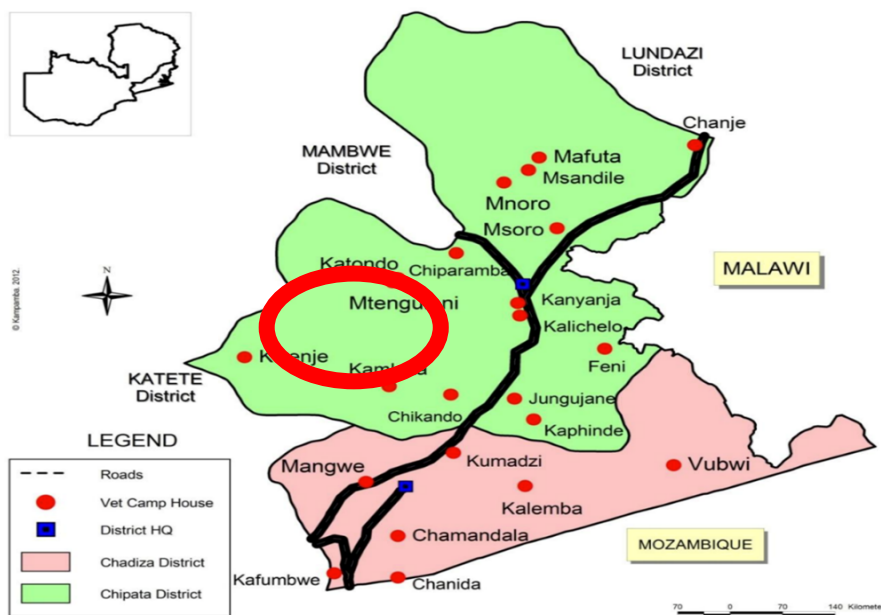

119  
120 **Fig 1: Map showing the Chiparamba area of Chipata district, Eastern province,**  
121 **Zambia. The red circle signifies the study area.**

122 The people of Chiparamba mainly practice subsistence farming with cattle, goats, pigs and  
123 chickens as the main livestock kept. The main crops grown include maize, groundnuts, bananas  
124 and cotton. Hand pumps are the main source of water for most villages. Their homes are made  
125 of mud bricks, and few of them have latrines. Since sanitation is poor, pigs access human faeces  
126 in nearby bushes that are used as latrines by the villagers. Later, these pigs are sold on the local  
127 market by the villagers. For this study, Chipata district was chosen based on our findings of a  
128 high prevalence of taeniasis and cysticercosis in the neighboring district of Katete among  
129 people keeping free-range pigs [7,12,13].

## 130 **Study design and participant selection**

131 This study was part of the TEPIM project “Establishment and application of a *Taenia solium*  
132 Experimental Pig Infection Model and investigation of environmental factors associated with  
133 transmission of *T. solium* in endemic villages of the Eastern and Southern provinces of  
134 Zambia”. Here, we report the human part of this study, which involved the collection of  
135 tapeworm proglottids to be used for the pig infection model. A cross-sectional study was  
136 conducted in the Chiparamba area of the Chipata district. A list of all the villages under the  
137 Chiparamba Rural Health Centre (RHC) catchment was obtained from the RHC, and villages  
138 were randomly selected for the study. Prior to sampling, the community was informed about  
139 the study and the activities that were to be conducted during a community sensitization day.  
140 To be eligible, study participants had to be willing and able to participate in all aspects of the  
141 study, including providing stool samples and informed consent (signature or thumbprint with  
142 impartial witness; assent for minors with parental consent), living in the study area and aged  
143 10 years or older. Participants were excluded if the listed inclusion criteria were not met or if  
144 they were seriously ill (unable to engage in the normal activities of daily living without  
145 assistance because of their illnesses) at the time of the study.

## 146 **Sample size**

147 Sample size estimation was based on the number of *T. solium* proglottids required for the  
148 experimental pig infection study. A total of 40 proglottids were required for the experimental  
149 infection study. At a reported taeniasis prevalence of 0.3% by microscopic examination [14]  
150 and assuming that two gravid proglottids were to be obtained from each tapeworm collected, a  
151 total of 6,668 people were to be tested for taeniasis from two districts, Chipata and Gwembe.  
152 Because the experimental infection study was discontinued due to logistical reasons and the  
153 Gwembe district site was not sampled, a sample size of 3,000 participants was targeted to  
154 estimate the prevalence of taeniasis and STH from the Chipata district.

## 155 **Sample collection and storage**

156 Information on the age, sex and village of each recruited participant was collected. Recruited  
157 individuals were each given a stool sample bottle. They were asked to fill at least half of the  
158 sample bottle with specimen and submit the samples to the research teams amounting to up to  
159 30 g of stool. As soon as the stool samples were submitted to the research team by the  
160 participants, they were placed on ice in a cooler box and stored in a refrigerator. Within 24  
161 hours of collection, the stool samples were aliquoted. Each sample was placed in 10% formalin  
162 to allow later analyses for the diagnosis of taeniasis. The formalin aliquots were kept at room  
163 temperature until analysis.

## 164 **Stool sample examination by microscopy**

165 Microscopic examination of stool was performed to determine the presence of *taenia* eggs and  
166 other intestinal helminths using the formol-ether concentration technique [19,20]. In brief, 2 g  
167 of fresh stool was transferred into a centrifuge tube containing 8 ml of 10% formal saline



168 solution and thoroughly mixed using bamboo skewers. Two mills of ether were then added,  
169 and after closing the tubes with a stopper, vigorously shaken for thorough mixing. The tubes  
170 were then centrifuged at 2500 rpm for 5 min. The supernatant fluid was decanted, leaving the  
171 sediment in the tube. A drop of the sediment was obtained and placed on a slide. A cover slip  
172 was then placed, and the slide was examined under the microscope. Duplicate smears were  
173 made for each sample to enhance sensitivity. The slide was then scanned systematically using  
174 the 10X objective, and if anything suspicious was seen, the 40X objective was used for a more  
175 detailed examination. The presence of a *taenia* egg on a slide was recorded as being positive  
176 for taeniasis, and the presence of other parasite eggs was also recorded during the examination.

## 177 **Stool sample examination by copro-antigen enzyme-linked**

### 178 **immunosorbent assay (Copro-Ag ELISA)**

179 The stool samples were analysed for the presence of copro-antigens using a polyclonal  
180 antibody-based antigen-ELISA (copro Ag-ELISA) as described by Allan et al 1990 [21] and  
181 with modifications as suggested by Mwape et al 2012 [14]. In brief, an equal amount of stool  
182 sample and phosphate-buffered saline (PBS) were mixed. The mixture was allowed to soak for  
183 one hour with intermediate shaking and thereafter centrifuged at  $2000 \times g$  for 30 minutes. The  
184 supernatant was then used for the Ag-ELISA. Polystyrene ELISA plates (NuncH Maxisorp)  
185 were then coated with the capturing hyperimmune rabbit anti-Taenia IgG polyclonal antibody  
186 diluted at 2.5 mg/ml in carbonate-bicarbonate buffer (0.06 M, pH 9.6). After coating, the plates  
187 were incubated for 1 hour at 37°C and then washed once with PBS in 0.05% Tween 20 (PBS-  
188 T20). All wells were then blocked by adding blocking buffer (PBS-T20+ 2% New Born Calf  
189 Serum) and incubated at 37°C for 1 hour, after which 100 ml of the stool supernatant was  
190 added, and the plates were incubated for 1 hour at 37°C followed by washing with PBS-T20  
191 five times. One hundred microliters of biotinylated hyperimmune rabbit IgG polyclonal

192 antibody diluted at 2.5 mg/ml in blocking buffer was added as a detecting antibody, and the  
193 plates were incubated for 1 hour at 37°C followed by washing five times. One hundred  
194 microliters of streptavidin-horseradish peroxidase (Jackson ImmunoResearch Lab, Inc.)  
195 diluted at 1/10,000 in blocking buffer was added as a conjugate and incubated at 37°C for 1  
196 hour. After washing five times, 100 ml of Ortho Phenylene Diamine (OPD) substrate, prepared  
197 by dissolving one tablet in 6 ml of distilled water and adding 2.5 ml of hydrogen peroxide, was  
198 added. The plates were incubated in the dark for 15 minutes at room temperature, after which  
199 50 ml of sulfuric acid (4 N) was added to each well to stop the reaction. The plates were read  
200 using an automated spectrophotometer at 490 nm with a reference of 655 nm. To determine the  
201 test result, the optical density (OD) of each stool sample was compared with the mean of a  
202 series of 8 reference Taenia-negative stool samples plus 3 standard deviations (cut-off).

## 203 **Data processing and analysis**

204 Data were entered electronically via tablets into the Kobo toolbox, an application for data  
205 collection installed on tablets [22]. The data were stored in a Microsoft Excel 2016 database  
206 (Microsoft Corporation; Redmond, WA, EUA), and later, statistical analyses were performed  
207 using IBM SPSS Statistics (Version 23). Descriptive analyses were conducted, and to  
208 determine associations between the categorical variables, a bivariate analysis was performed  
209 using either the chi-square or Fisher's exact test. Predictors of an individual being positive for  
210 either taeniasis or STH were determined using binary logistic regression. The variables  
211 included in the model were age, sex, village and results of the copro antigen-ELISA and  
212 microscopy examination. A significant Omnibus Test of Model Coefficients ( $p \leq 0.050$ ) and a  
213 nonsignificant Hosmer–Lemeshow test ( $p > 0.050$ ) were used to determine if the model fit the  
214 data [23,24]. The model returned the odds ratios with their 95% confidence intervals for

215 taeniasis and other intestinal helminth positivity. All statistics were considered significant at  $p$   
216  $\leq 0.05$ .

## 217 **Ethical approval**

218 Ethical clearance was obtained from the ERES CONVERGE Institutional Review Board (IRB)  
219 (Reference number 2018-March-002). Approval was also obtained from the Ministry of Health  
220 through the Zambia National Health Research Authority (ZNHRA). Further approval was  
221 sought from the community leaders before commencement of the study. All participants were  
222 informed about all aspects of the study before inclusion, and all signed an informed consent  
223 form. For individuals below the consenting age, written formal consent was obtained from their  
224 parents or guardians.

## 225 **Results**

226 A total of 2,921 participants were recruited in the study, of which 2,762 (95%) submitted stool  
227 samples for analysis. Of those who submitted stool samples, the majority (1,610, 58.3%) were  
228 female (Fig 2). The minimum and maximum ages were 10 and 100 years, respectively, with a  
229 mean age of 29 years (SD = 17.5). The majority (2,074, 75%) of the participants were younger  
230 than 40 years, with the age group 10 – 20 years contributing the most (Table 1).

231

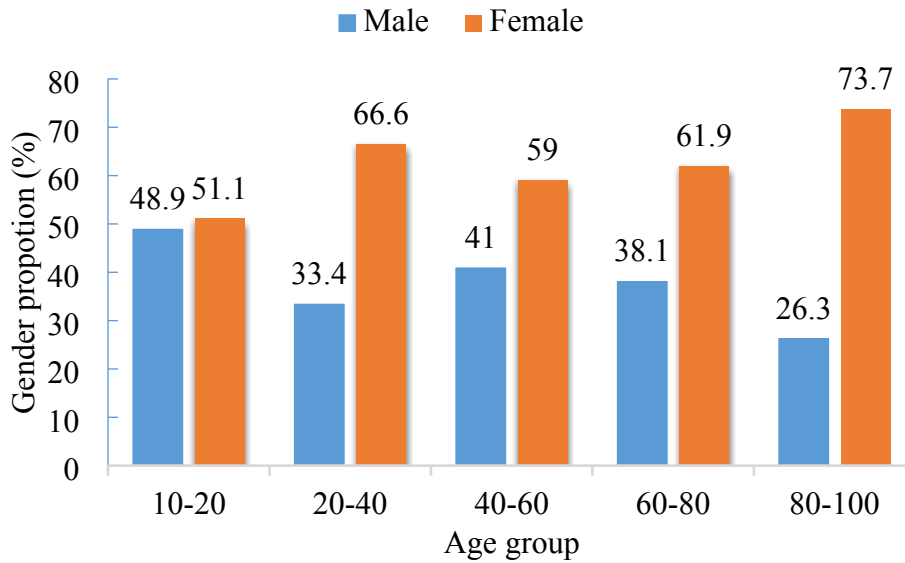

232

233 **Fig 2. Sex distribution by age group of participants in the Chiparamba area of Chipata**  
 234 **district, Eastern province, Zambia.**

235 **Table 1. Distribution of participants by age group in the Chiparamba area of Chipata**  
 236 **district, Eastern province, Zambia.**

|           |        | Number | Percent |
|-----------|--------|--------|---------|
| Age group | 10-20  | 1199   | 43.4    |
|           | 20-40  | 875    | 31.7    |
|           | 40-60  | 514    | 18.6    |
|           | 60-80  | 155    | 5.6     |
|           | 80-100 | 19     | 0.7     |

237 The number of participants per village related to the overall study size ranged from 28 (0.9%)  
 238 in Payani village to a maximum of 213 (7.7%) in Chiweteka village (S1 Fig).

### 239 **Intestinal helminths**

240 One hundred ninety-five participants (7.1%, 95% CI = 6.2 – 8.1) tested positive for at least one  
 241 intestinal parasite on microscopy. Twelve (0.4%, 95% CI = 0.2 – 0.7) participants had more

242 than one parasite. Overall, seven different species of intestinal parasites were identified. These  
 243 included *Taenia* spp, *S. mansoni*, *A. lumbricoides*, *T. trichiura*, *Enterobius vermicularis*,  
 244 *Entamoeba* spp. and hookworm spp. (Table 2). The most frequent infection was due to  
 245 hookworm (84, 3.0%), followed by *S. mansoni* (66, 2.4%). Infections by *T. trichiura* (11,  
 246 0.4%), *A. lumbricoides* (7, 0.3%), *E. vermicularis* (4, 0.1%), and *Entamoeba* spp. (6, 0.2%)  
 247 were less prevalent (Table 2). Intestinal helminth infection was higher in the 20 – 40 and 40 –  
 248 60-year-old age groups, although this difference within age categories was overall not  
 249 statistically significant ( $p = 0.900$ ) (Fig 3, Table 3). There was a statistically significant  
 250 difference ( $p = 0.012$ ) in the prevalence of infection between sexes, with more males infected  
 251 (Table 3). Among villages, the prevalence of intestinal helminths was also significantly  
 252 different ( $p < 0.001$ ), with prevalence ranging from 1.8% in Mzamo village to 20.8% in  
 253 Kochiwe village (Table 4).

254 **Table 2. Intestinal parasites identified through microscopy in the Chiparamba area of**  
 255 **the Chipata district, Eastern province, Zambia. (n = 2762)**

|                   |                                       | Positive | Percent | 95%CI     |
|-------------------|---------------------------------------|----------|---------|-----------|
| Single infections | <i>Taenia</i> spp.                    | 11       | 0.4     | 0.2 – 0.7 |
|                   | Hookworm                              | 84       | 3.0     | 2.4 – 3.7 |
|                   | <i>Ascaris lumbricoides</i>           | 7        | 0.3     | 0.2 – 0.6 |
|                   | <i>Trichuris trichiura</i>            | 11       | 0.4     | 0.2 – 0.7 |
|                   | <i>Enterobius vermicularis</i>        | 4        | 0.1     | 0.0 – 0.3 |
|                   | <i>Schistosoma mansoni</i>            | 66       | 2.4     | 1.9 – 3.0 |
| Total             |                                       | 183      | 6.6     | 5.7 – 7.6 |
| Poly-parasitism   | Hookworm/ <i>Entamoeba</i> spp.       | 6        | 0.2     | 0.1 – 0.4 |
|                   | Hookworm/ <i>Schistosoma mansoni</i>  | 3        | 0.1     | 0.0 – 0.3 |
|                   | Hookworm/ <i>Ascaris lumbricoides</i> | 3        | 0.1     | 0.0 – 0.3 |
| Total             |                                       | 12       | 0.4     | 0.2 – 0.7 |

256

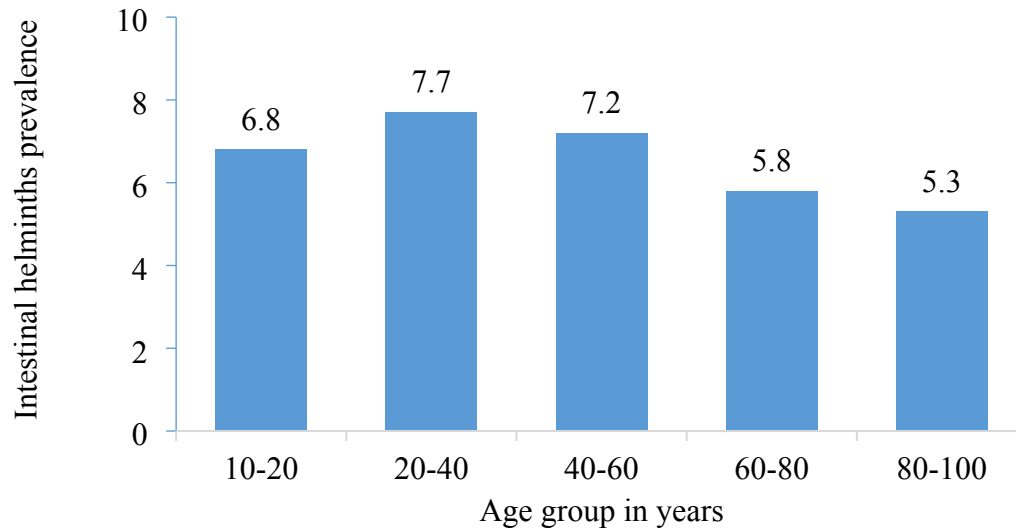

257

258 **Fig 3. Prevalence of intestinal helminths by age group in the Chiparamba area of**  
259 **Chipata district, Eastern province, Zambia.**

260 **Table 3. Prevalence of intestinal helminths by age and sex in the Chiparamba area of Chipata district, Eastern province, Zambia.**

|                 |        | Number | Single parasites |          |         |         |         | Poly-parasitism |         |         | Total (%) | p value   |       |
|-----------------|--------|--------|------------------|----------|---------|---------|---------|-----------------|---------|---------|-----------|-----------|-------|
|                 |        |        | TS               | HW       | AL      | TT      | EV      | SM              | HW/EN   | HW/SM   |           |           | HW/AL |
| Age group       | 10-20  | 1199   | 4 (0.3)          | 31 (2.6) | 3 (0.3) | 6 (0.5) | 1 (0.1) | 29 (2.4)        | 3 (0.3) | 1 (0.1) | 3 (0.3)   | 81 (6.8)  | 0.900 |
|                 | 20-40  | 875    | 4 (0.5)          | 33 (3.8) | 2 (0.2) | 2 (0.2) | 1 (0.1) | 23 (2.6)        | 1 (0.1) | 1 (0.1) | 0         | 67 (7.7)  |       |
|                 | 40-60  | 514    | 2 (0.4)          | 15 (2.9) | 2 (0.4) | 2 (0.4) | 1 (0.2) | 13 (2.5)        | 1 (0.2) | 1 (0.2) | 0         | 37 (7.2)  |       |
|                 | 60-80  | 155    | 1 (0.6)          | 4 (2.6)  | 0       | 1 (0.6) | 1 (0.6) | 1 (0.6)         | 1 (0.6) | 0       | 0         | 9 (5.8)   |       |
|                 | 80-100 | 19     | 0                | 1 (5.3)  | 0       | 0       | 0       | 0               | 0       | 0       | 0         | 1 (5.3)   |       |
| Participant sex | Male   | 1152   | 6 (0.5)          | 46 (4.0) | 6 (0.5) | 7 (0.6) | 1 (0.1) | 28 (2.4)        | 2 (0.2) | 1 (0.1) | 3 (0.3)   | 100 (8.7) | 0.012 |
|                 | Female | 1610   | 5 (0.3)          | 38 (2.4) | 1 (0.1) | 4 (0.2) | 3 (0.2) | 38 (2.4)        | 4 (0.2) | 2 (0.1) | 0         | 95 (5.9)  |       |

261 AL, *Ascaris lumbricoides*; EN, *Entamoeba* spp; EV, *Enterobius vermicularis*; HW, Hookworm; SM, *Schistosoma mansoni*; TS, *Taenia* spp; TT,  
 262 *Trichuris trichiura*.

263

264

265

266

267

**Table 4. Prevalence of intestinal helminths by village in the Chiparamba area of Chipata district, Eastern province, Zambia.**

| Village       | Number | Single parasites |          |         |         |         |           | Poly-parasitism |         |         | Total     | <i>p</i> value |
|---------------|--------|------------------|----------|---------|---------|---------|-----------|-----------------|---------|---------|-----------|----------------|
|               |        | TS               | HW       | AL      | TT      | EV      | SM        | HW/EN           | HW/SM   | HW/AL   |           |                |
| Bvuso         | 93     | 0                | 3 (3.2)  | 0       | 0       | 0       | 0         | 0               | 0       | 0       | 3 (3.2)   | <0.001         |
| Chiweteka     | 213    | 2 (0.9)          | 6 (2.8)  | 0       | 0       | 0       | 0         | 2 (0.9)         | 0       | 1 (0.5) | 11 (5.2)  |                |
| Chimutangati  | 28     | 0                | 0        | 0       | 0       | 0       | 4 (14.3)  | 0               | 0       | 0       | 4 (14.3)  |                |
| Chinthona     | 78     | 0                | 1 (1.3)  | 0       | 3 (3.8) | 1 (1.3) | 2 (2.6)   | 1 (1.3)         | 0       | 0       | 8 (10.2)  |                |
| Chunichikuwe  | 88     | 0                | 9 (10.2) | 0       | 2 (2.3) | 0       | 1 (1.1)   | 1 (1.1)         | 0       | 0       | 13 (14.8) |                |
| Chiweza       | 125    | 0                | 1 (0.8)  | 0       | 0       | 1 (0.8) | 2 (1.6)   | 0               | 0       | 0       | 4 (3.2)   |                |
| Kaliyoyo      | 75     | 0                | 0        | 0       | 0       | 0       | 4 (5.3)   | 0               | 0       | 0       | 4 (5.3)   |                |
| Kanamanja     | 148    | 1 (0.7)          | 5 (3.4)  | 0       | 2 (1.4) | 0       | 9 (6.1)   | 1 (0.7)         | 0       | 0       | 18 (12.2) |                |
| Kasosa        | 112    | 0                | 2 (1.8)  | 0       | 0       | 0       | 1 (0.9)   | 0               | 0       | 0       | 3 (2.7)   |                |
| Kabendama     | 171    | 0                | 3 (1.8)  | 0       | 0       | 0       | 1 (0.6)   | 0               | 0       | 0       | 4 (2.3)   |                |
| Kochiwe       | 53     | 0                | 0        | 0       | 0       | 0       | 10 (18.9) | 0               | 1 (1.9) | 0       | 11 (20.8) |                |
| Kalumekalinga | 146    | 1 (0.7)          | 4 (2.7)  | 0       | 1 (0.7) | 0       | 0         | 0               | 0       | 2 (1.4) | 8 (5.5)   |                |
| Lufu          | 141    | 0                | 3 (2.1)  | 0       | 0       | 0       | 5 (3.5)   | 1 (0.7)         | 2 (1.4) | 0       | 11 (7.8)  |                |
| Majuku        | 71     | 0                | 2 (2.8)  | 0       | 1 (1.4) | 1 (1.4) | 0         | 0               | 0       | 0       | 4 (5.6)   |                |
| Misholo       | 159    | 0                | 6 (3.8)  | 0       | 0       | 1 (0.6) | 9 (5.7)   | 0               | 0       | 0       | 16 (10.1) |                |
| Mkanile       | 99     | 1 (1.0)          | 1 (1.0)  | 0       | 0       | 0       | 2 (2.0)   | 0               | 0       | 0       | 4 (4.0)   |                |
| Mteyo         | 82     | 0                | 4 (4.9)  | 0       | 0       | 0       | 4 (4.9)   | 0               | 0       | 0       | 8 (9.8)   |                |
| Mulilo        | 170    | 3 (1.8)          | 10 (5.9) | 3 (1.8) | 0       | 0       | 0         | 0               | 0       | 0       | 16 (9.4)  |                |
| Mzamo         | 55     | 1 (1.8)          | 0        | 0       | 0       | 0       | 0         | 0               | 0       | 0       | 1 (1.8)   |                |
| Nkhunda       | 74     | 0                | 0        | 0       | 1 (1.4) | 0       | 1 (1.4)   | 0               | 0       | 0       | 2 (2.7)   |                |
| Payani        | 26     | 0                | 2 (7.7)  | 0       | 0       | 0       | 2 (7.7)   | 0               | 0       | 0       | 4 (15.4)  |                |
| Simeon        | 135    | 0                | 9 (6.7)  | 1 (0.7) | 1 (0.7) | 0       | 0         | 0               | 0       | 0       | 11 (8.1)  |                |
| Soweto        | 118    | 0                | 2 (1.7)  | 2 (1.7) | 0       | 0       | 1 (0.8)   | 0               | 0       | 0       | 5 (4.2)   |                |
| Vwala         | 185    | 0                | 6 (3.2)  | 0       | 0       | 0       | 4 (2.2)   | 0               | 0       | 0       | 10 (5.4)  |                |
| Yohane        | 117    | 2 (1.7)          | 5 (4.3)  | 1 (0.9) | 0       | 0       | 4 (3.4)   | 0               | 0       | 0       | 12 (10.3) |                |



269 AL, *Ascaris lumbricoides*; EN, *Entamoeba* spp; EV, *Enterobius vermicularis*; HW, Hookworm; SM, *Schistosoma mansoni*; TS, *Taenia* spp; TT,

270 *Trichuris trichiura*.

271 Regarding intestinal parasite infection per village, of the 25 villages sampled, 21 had  
272 participants with hookworm infection, while 18 villages had participants infected with *S.*  
273 *mansoni*. The number of villages with particular intestinal parasite infections is shown in (Fig  
274 4).

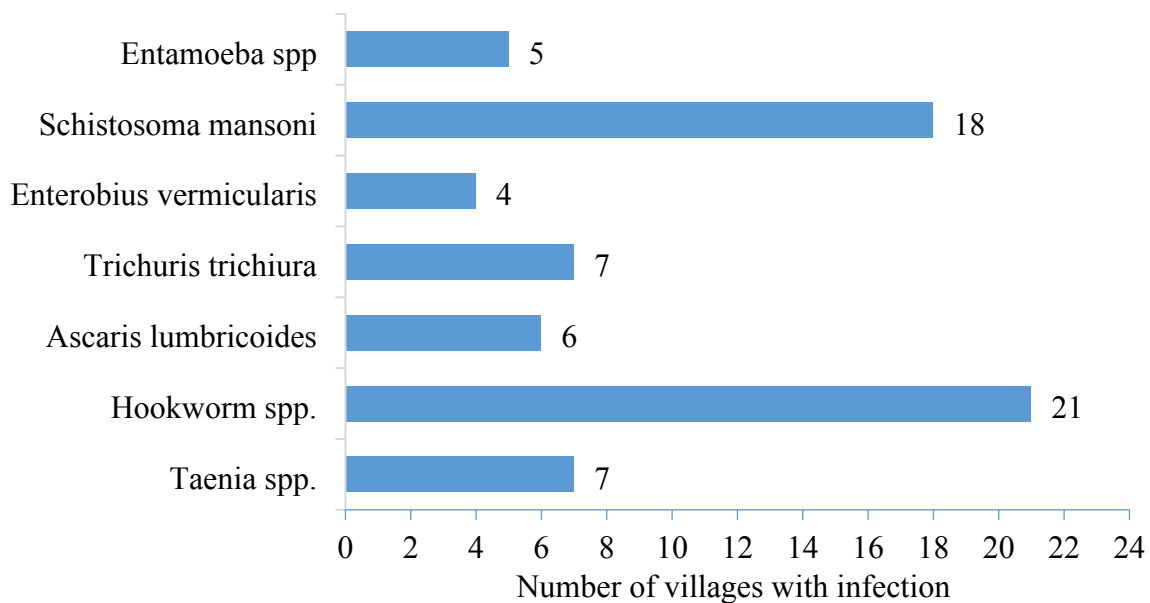

275

276 **Fig 4: Intestinal parasites and number of villages with infection in the Chiparamba area**  
277 **of Chipata district, Eastern province, Zambia.**

### 278 **Predictors of being positive for intestinal parasite infection**

279 Using binary logistic regression, sex and village were significantly associated with intestinal  
280 parasite infection. The odds of male participants being positive for parasite infection were 1.5  
281 times higher than those of females (95% CI 1.1 – 2.0,  $p = 0.008$ ). The odds of being positive  
282 for intestinal parasite infection were significantly higher for Chiweteka, Chinthona, Kaliyoyo,  
283 Kabendama and Nkhunda villages than for Yohane village (Table 5).

284

285 **Table 5. Predictors of a positive intestinal parasite result.**

| Predictor variable |               | OR         | 95% CI     | <i>p</i> value |
|--------------------|---------------|------------|------------|----------------|
| Sex                | Male          | 1.5        | 1.1 – 2.0  | 0.008          |
|                    | Female        | Ref        |            |                |
| Village            | Bvuso         | 1.4        | 0.4 – 5.1  | 0.658          |
|                    | Chiweteka     | 5.1        | 1.1 – 24.3 | 0.042          |
|                    | Chimutangati  | 3.4        | 0.9 – 13.3 | 0.080          |
|                    | Chinthona     | 5.4        | 1.5 – 19.7 | 0.011          |
|                    | Chunichikuwe  | 1.0        | 0.2 – 4.6  | 0.990          |
|                    | Chiweza       | 1.8        | 0.4 – 8.1  | 0.470          |
|                    | Kaliyoyo      | 4.0        | 1.1 – 14.1 | 0.030          |
|                    | Kanamanja     | 0.8        | 0.2 – 4.4  | 0.837          |
|                    | Kasosa        | 0.7        | 0.2 – 3.3  | 0.686          |
|                    | Kabendama     | 7.8        | 2.1 – 29.7 | 0.002          |
|                    | Kochiwe       | 1.5        | 0.4 – 6.0  | 0.552          |
|                    | Kalumekalinga | 2.6        | 0.7 – 9.6  | 0.152          |
|                    | Lufu          | 2.0        | 0.4 – 9.0  | 0.392          |
|                    | Majuku        | 3.4        | 1.0 – 11.9 | 0.060          |
|                    | Misholo       | 1.0        | 0.2 – 4.9  | 0.961          |
|                    | Mkanile       | 3.3        | 0.9 – 13.0 | 0.083          |
|                    | Mteyo         | 2.5        | 0.7 – 9.2  | 0.153          |
|                    | Mulilo        | 0.0        | 0.0        | 0.997          |
|                    | Mzamo         | 0.8        | 0.1 – 5.1  | 0.841          |
|                    | Nkhunda       | 5.5        | 1.1 – 26.3 | 0.034          |
| Payani             | 2.7           | 0.7 – 10.1 | 0.130      |                |
| Simeon             | 1.4           | 0.3 – 6.0  | 0.660      |                |
| Soweto             | 1.7           | 0.5 – 6.4  | 0.426      |                |
| Vwala              | 2.9           | 0.8 – 10.9 | 0.113      |                |
| Yohane             | Ref           |            |            |                |

286 OR, odds ratio; Ref, reference standard.

## 287 **Intestinal helminthiasis due to taeniasis**

288 Of the 2762 stool samples submitted, 241 (8.7%, 95% CI = 7.7 – 9.8) tested positive for  
 289 taeniasis on copro Ag-ELISA, and 11 (0.4%) tested positive on microscopy. Overall, 241  
 290 (8.7%) participants tested positive for taeniasis on either copro Ag-ELISA or microscopy, with  
 291 eleven (0.4%, 95% CI = 0.2 – 0.7) participants testing positive on both copro Ag-ELISA and

292 microscopy examination. The majority (230, 95.4%, 95% CI = 92.0 – 97.4) were positive only  
 293 by copro Ag-ELISA (Table 6).

294 **Table 6. Prevalence of taeniasis based on copro Ag-ELISA and microscopic**  
 295 **examination of stool samples in the Chiparamba area of Chipata district, Eastern**  
 296 **province, Zambia.**

|                                                                    | Number | Positive | Percent | 95%CI       |
|--------------------------------------------------------------------|--------|----------|---------|-------------|
| Copro Ag-ELISA                                                     | 2762   | 241      | 8.7     | 7.7 – 9.8   |
| Microscopy                                                         |        | 11       | 0.4     | 0.2 – 0.7   |
| <i>Results on parallel test with copro Ag-ELISA and microscopy</i> |        |          |         |             |
| Pos copro Ag-ELISA/Pos microscopy                                  | 241    | 11       | 4.6     | 2.6 – 8.0   |
| Pos copro Ag-ELISA/Neg microscopy                                  |        | 230      | 95.4    | 92.0 – 97.4 |

297 Ag, Antigen; CI, Confidence interval; ELISA, Enzyme-linked immunosorbent assay; Neg,  
 298 Negative; Pos, Positive.

299 When we compared taeniasis prevalence by age group, it was observed that the 60-80 age group  
 300 reported a higher prevalence by copro Ag-ELISA than those below 60 years and those above  
 301 80 years (Fig 5).

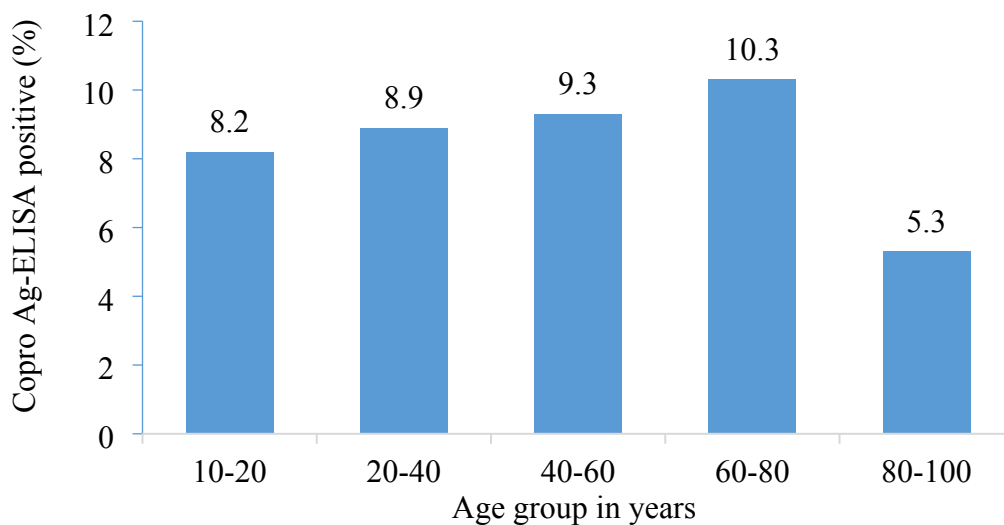

302

303 **Fig 5. Taeniasis prevalence based on copro Ag-ELISA by age group in the Chiparamba**  
304 **area of Chipata district, Eastern province, Zambia.**

305 No positive case on copro Ag-ELISA was reported from 6 villages, and based on microscopy  
306 examination of the stool, seven villages had at least one person with *Taenia* spp. eggs (Table  
307 7). Tapeworm proglottids were obtained from one participant after treatment with 2 grams of  
308 niclosamide and purgation with magnesium sulfate, although these were not confirmed if they  
309 were for *T. solium*.

310 **Table 7. Prevalence of taeniasis based on copro Ag-ELISA and microscopy by village in**  
311 **Chiparamba area of Chipata district, Eastern province, Zambia.**

| Village       | Number | Copro Ag-ELISA |             |                | Microscopy   |            |                |
|---------------|--------|----------------|-------------|----------------|--------------|------------|----------------|
|               |        | Positive (%)   | 95%CI       | <i>p</i> value | Positive (%) | 95%CI      | <i>p</i> value |
| Bvuso         | 93     | 0              |             | <0.001         | 0            |            | 0.430          |
| Chiweteka     | 213    | 35 (16.4)      | 12.0 – 22.0 |                | 2 (0.9)      | 0.2 – 3.3  |                |
| Chimutangati  | 28     | 0              |             |                | 0            |            |                |
| Chinthona     | 78     | 0              |             |                | 0            |            |                |
| Chunichikuwe  | 88     | 0              |             |                | 0            |            |                |
| Chiweza       | 125    | 3 (2.4)        | 0.8 – 6.8   |                | 0            |            |                |
| Kaliyoyo      | 75     | 2 (2.7)        | 0.7 – 9.3   |                | 0            |            |                |
| Kanamanja     | 148    | 25 (16.9)      | 11.7 – 23.8 |                | 1 (0.7)      | 0.13 – 3.8 |                |
| Kasosa        | 112    | 13 (11.6)      | 6.9 – 18.8  |                | 0            |            |                |
| Kabendama     | 171    | 27 (15.8)      | 11.1 – 22.0 |                | 0            |            |                |
| Kochiwe       | 53     | 0              |             |                | 0            |            |                |
| Kalumekalinga | 146    | 14 (9.6)       | 5.8 – 15.5  |                | 1 (0.7)      | 0.1 – 3.8  |                |
| Lufu          | 141    | 10 (7.1)       | 3.9 – 12.6  |                | 0            |            |                |
| Majuku        | 71     | 6 (8.5)        | 4.0 – 17.3  |                | 0            |            |                |
| Misholo       | 159    | 42 (26.4)      | 20.1 – 33.8 |                | 0            |            |                |
| Mkanile       | 99     | 8 (8.1)        | 4.2 – 15.2  |                | 1 (1.0)      | 0.2 – 5.5  |                |
| Mteyo         | 82     | 8 (9.8)        | 5.2 – 17.8  |                | 0            |            |                |
| Mulilo        | 170    | 3 (1.8)        | 0.6 – 5.1   |                | 3 (1.8)      | 0.6 – 5.1  |                |
| Mzamo         | 55     | 1 (1.8)        | 0.3 – 9.6   |                | 1 (1.8)      | 0.3 – 9.6  |                |
| Nkhunda       | 74     | 10 (13.5)      | 7.5 – 23.1  |                | 0            |            |                |
| Payani        | 26     | 0              |             |                | 0            |            |                |
| Simeon        | 135    | 2 (1.5)        | 0.4 – 5.3   |                | 0            |            |                |
| Soweto        | 118    | 6 (5.1)        | 2.4 – 10.7  |                | 0            |            |                |
| Vwala         | 185    | 21 (11.4)      | 7.6 – 16.8  |                | 0            |            |                |
| Yohane        | 117    | 5 (4.3)        | 1.9 – 9.6   |                | 2 (1.7)      | 0.5 – 6.0  |                |
| Total         | 2762   | 241 (8.7)      | 7.7 – 9.8   |                | 11 (0.4)     | 0.2 – 0.7  |                |

312 Considering the results based on copro Ag-ELISA and microscopy examination, there was a  
313 statistically significant difference in the prevalence of taeniasis based on copro Ag-ELISA  
314 among the villages ( $p < 0.001$ ), with the highest prevalence reported in Misholo village at 26.4%  
315 (Fig 6, Table 7). However, sex and age were not significantly associated with the prevalence  
316 of taeniasis in our study area (Table 8).

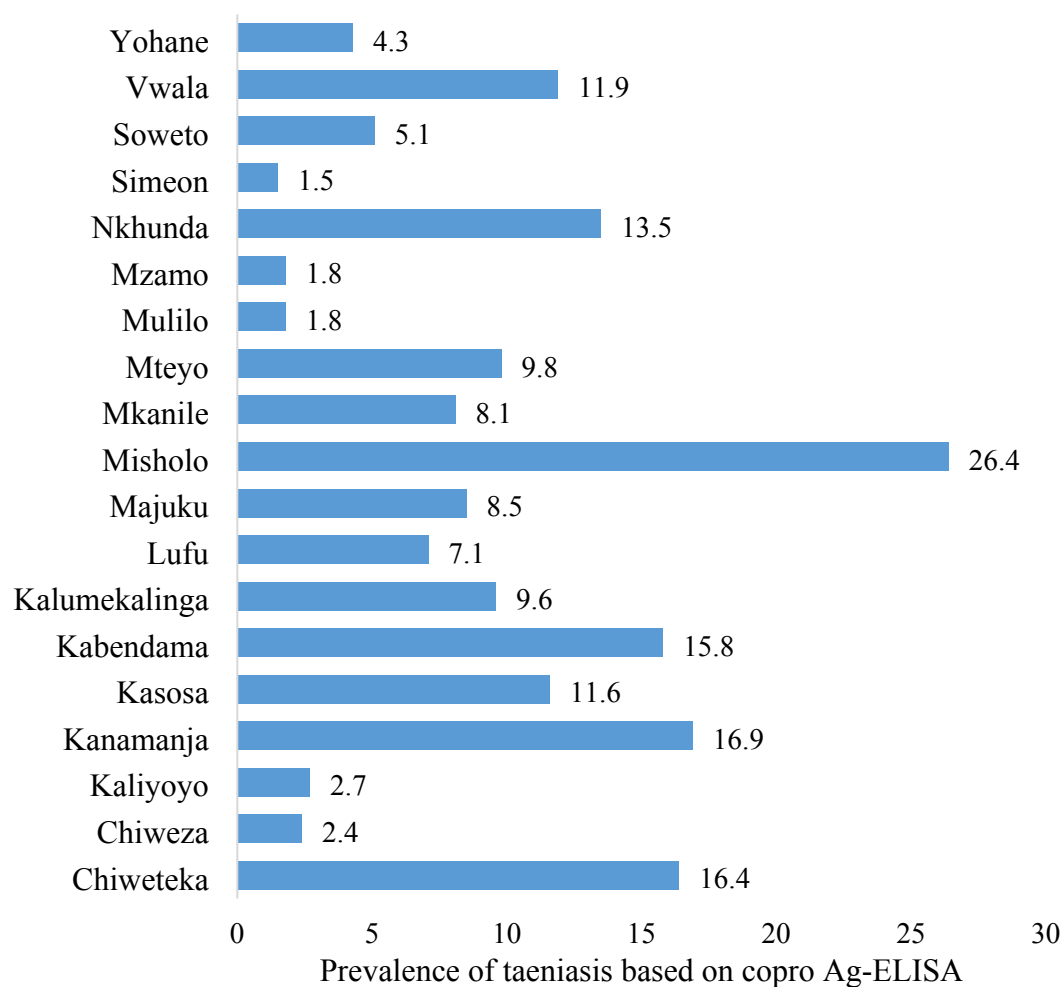

317

318 **Fig 6. Prevalence of taeniasis based on copro Ag-ELISA by village in the Chiparamba**  
319 **area of Chipata district, Eastern province, Zambia.**

320

321

322 **Table 8. Comparison of taeniasis prevalence based on copro Ag-ELISA and microscopy**  
323 **with sex and age in the Chiparamba area of Chipata district, Eastern province, Zambia.**

|           |        | Copro Ag-ELISA |              |            |                | Microscopy   |           |                |
|-----------|--------|----------------|--------------|------------|----------------|--------------|-----------|----------------|
|           |        | Number         | Positive (%) | 95% CI     | <i>p</i> value | Positive (%) | 95% CI    | <i>p</i> value |
| Sex       | Male   | 1152           | 105 (9.1)    | 7.6 – 10.9 | 0.539          | 6 (0.5)      | 0.2 – 1.1 | 0.542          |
|           | Female | 1610           | 136 (8.4)    | 7.1 – 9.9  |                | 5 (0.3)      | 0.1 – 0.7 |                |
| Age group | 10-20  | 1199           | 98 (8.2)     | 6.8 – 9.9  | 0.823          | 4 (0.3)      | 0.1 – 0.8 | 0.764          |
|           | 20-40  | 875            | 78 (8.9)     | 7.2 – 11.0 |                | 4 (0.5)      | 0.2 – 1.2 |                |
|           | 40-60  | 514            | 48 (9.3)     | 7.1 – 12.1 |                | 2 (0.4)      | 0.1 – 1.4 |                |
|           | 60-80  | 155            | 16 (10.3)    | 6.4 – 16.1 |                | 1 (0.6)      | 0.1 – 3.5 |                |
|           | 80-100 | 19             | 1 (5.3)      | 0.9 – 24.7 |                | 0            | 0.0 – 0.2 |                |

324 **Predictors of a positive taeniasis result**

325 Using binary logistic regression, only village was found to be a significant predictor of being  
326 positive for taeniasis based on copro Ag-ELISA results, with nine villages having significantly  
327 higher odds compared to Yohane village (Table 9). No variables had significant odds of being  
328 positive on microscopy.

329

330

331

332

333

334

335

336 **Table 9. Predictors of a positive taeniosis result on copro Ag-ELISA.**

|         | Predictor variable | OR         | 95% CI     | <i>p</i> value. |
|---------|--------------------|------------|------------|-----------------|
| Village | Bvuso              | 0.0        | 0.0        | 0.997           |
|         | Chiweteka          | 6.9        | 2.1 – 23.1 | 0.002           |
|         | Chimutangati       | 0.0        | 0.0        | 0.998           |
|         | Chinthona          | 0.0        | 0.0        | 0.997           |
|         | Chunichikuwe       | 0.0        | 0.0        | 0.997           |
|         | Chiweza            | 0.9        | 0.2 – 4.6  | 0.918           |
|         | Kaliyoyo           | 1.0        | 0.2 – 6.3  | 0.981           |
|         | Kanamanja          | 7.3        | 2.1 – 24.9 | 0.002           |
|         | Kasosa             | 4.9        | 1.4 – 17.7 | 0.015           |
|         | Kabendama          | 7.0        | 2.1 – 23.7 | 0.002           |
|         | Kochiwe            | 0.0        | 0.0        | 0.997           |
|         | Kalumekalinga      | 3.7        | 1.0 – 13.2 | 0.046           |
|         | Lufu               | 2.9        | 0.8 – 10.6 | 0.118           |
|         | Majuku             | 3.4        | 0.8 – 14.2 | 0.088           |
|         | Misholo            | 13.4       | 4.0 – 44.5 | <0.001          |
|         | Mkanile            | 2.9        | 0.7 – 11.4 | 0.134           |
|         | Mteyo              | 4.0        | 1.0 – 15.7 | 0.044           |
|         | Mulilo             | 0.0        | 0.0        | 0.995           |
|         | Mzamo              | 0.0        | 0.0        | 0.997           |
|         | Nkhunda            | 5.8        | 1.5 – 22.0 | 0.009           |
| Payani  | 0.0                | 0.0        | 0.998      |                 |
| Simeon  | 0.6                | 0.1 – 3.4  | 0.531      |                 |
| Soweto  | 2.0                | 0.5 – 8.2  | 0.335      |                 |
| Vwala   | 4.8                | 1.4 – 16.4 | 0.013      |                 |
|         | Yohane             | Ref        |            |                 |

337 OR, odds ratio; Ref, reference standard.

## 338 Discussion

339 This study aimed to determine the prevalence of intestinal helminthiasis and taeniasis in a rural  
340 community known to have risk factors for *T. solium* in the eastern province of Zambia.

341 We found that intestinal helminth infections are endemic in our study area, with 7.1% of the  
342 participants infected with at least one intestinal helminth species. Among the nematode species,  
343 hookworm infection was the most predominant, followed by *A. lumbricoides* and *T. trichiura*  
344 infection. The prevalence of hookworms was similar to the 3.5% prevalence reported among



345 the general population in the Southern province of Zambia [15]. However, the prevalence  
346 reported in our study was much lower than that reported in previous studies in Zambia. For  
347 instance, in the Luangwa, Kalabo, and Serenje districts of Zambia, hookworm prevalence  
348 ranging from 12% to 35% was reported [25]. Previous studies conducted in the central province  
349 of Zambia also reported a high hookworm infection prevalence ranging from 11% to 77% [26].  
350 Hookworm infections have also been the predominant intestinal helminths reported in some  
351 studies conducted among the general population in Ethiopia [27], India [28] and South Africa  
352 [29]. However, in most studies among children, infection with *A. lumbricoides* has generally  
353 been higher than that with hookworms. A study conducted among children in Chililabombwe  
354 district and another conducted at a children's hospital in Ndola on the Copperbelt province of  
355 Zambia showed *A. lumbricoides* infection to be more prevalent compared to hookworm and  
356 other nematodes [17,18]. Globally, it is also estimated that infection with *A. lumbricoides* has  
357 the widest distribution [30]. The overall prevalence of intestinal helminths in our study was  
358 lower than that reported in previous studies in Zambia, which reported numbers of up to 12 –  
359 35% [15,17,25]. One reason could be that our sample size was much larger than that used in  
360 other studies and may therefore be more representative. The other reason is probably due to the  
361 annual mass drug administration (MDA), a deworming programme conducted by the Ministry  
362 of Health in conjunction with the Ministry of Education, leading to the assumption that these  
363 programmes have a positive effect on infection prevalence. Infection with helminths has been  
364 shown to affect the growth and development of children, and children with helminth infections  
365 are also more likely to be absent from school, hence affecting school attendance [6].  
366 Subsequent continued annual treatment of school-aged children for soil-transmitted helminths  
367 has also contributed to a reduction in the number of eggs being expelled and the resulting  
368 prevalence [31,32].

369 As another parasitic worm infection, schistosomiasis is also endemic in Zambia [33]. The  
370 prevalence of *S. mansoni* within our study was similar to the overall prevalence of 2.9% found  
371 in the Southern province of Zambia [15], which can be classified as low prevalence according  
372 to WHO grading [6]. However, a higher prevalence of up to 73% for *S. mansoni* has been  
373 reported in the Western province [34]. In our study, schistosomiasis was more prevalent in  
374 villages that were located near streams. This observation may indicate a lack of sufficient  
375 sanitary facilities and the use of contaminated water for domestic and recreational activities  
376 [15,35,36]. *S. mansoni* has also been associated with long-term health problems. For example,  
377 in the northwestern province of Zambia, cases of periportal liver fibrosis among rural children  
378 were reported [37], and in the western province, cases of periportal liver fibrosis and main  
379 portal branch fibrosis were reported among children [35]. This calls for disease control  
380 managers and policy makers in the country to devise new control strategies and regular disease  
381 surveillance programmes through multisectoral collaborations, which contribute towards  
382 having successful MDA programmes informed by disease distribution patterns.

383 With effective knowledge sharing, improved sanitary conditions and deworming, control of  
384 intestinal helminth infections can be achieved. Deworming, which is safe, effective, and  
385 inexpensive, has been shown to improve the growth and development of children [3]. These  
386 MDA programmes need to be sustained and should focus more on high prevalence villages,  
387 including targeting adults [15].

388 Hyperendemicity for *T. solium* taeniasis in an area is defined as a point prevalence rate greater  
389 than 1% [38]. Our study community, with an estimated prevalence of 8.7% by copro Ag-  
390 ELISA, was thus hyperendemic to taeniasis. The infection displayed great heterogeneity  
391 between villages, as seen from the significant variability in proportions between villages  
392 ranging from 0 – 26%. Similar variations were also reported in studies conducted in Peru and

393 Guatemala using copro Ag-ELISA [39,40]. The variation between villages could be due to  
394 differences in the consumption of infected pork, cooking habits or household dietary habits.  
395 Further studies are required to understand the causes of this variation.

396 The prevalence of taeniasis by copro Ag-ELISA in our study area was much higher than that  
397 found using stool microscopy. Copro Ag-ELISA has a sensitivity that is 2 – 10 times higher  
398 than that of microscopy, which could explain the difference in the two prevalences [41].  
399 However, we are cautious in interpreting the high proportion on copro Ag-ELISA because the  
400 test cannot differentiate between *T. solium* and *Taenia saginata* infections, as it is only genus  
401 specific [41]. It is therefore possible that the proportions of people being positive for *T. solium*  
402 could have been overestimated. Nonetheless, based on samples from within the Eastern  
403 province of Zambia, Bayesian modelling estimating the test characteristics of coprology, copro  
404 Ag-ELISA and PCR for the diagnosis of taeniasis yielded estimates for sensitivity and  
405 specificity of 84.5% and 92% for copro Ag-ELISA [42]. Despite cattle farming being highly  
406 practiced and the consumption of beef being high, bovine cysticercosis in Zambia has thus far  
407 only been reported in the central and southern provinces [43]; hence, the risk for coinfection  
408 with *T. saginata* in our study area was low.

409 The overall taeniasis positivity determined by copro Ag-ELISA in this study is higher than the  
410 prevalence of 6.3% reported in Petauke district within the Eastern province of Zambia but  
411 lower than the 11.9% reported in the neighboring district of Katete [7,14]. It was also higher  
412 than the 5.2% reported in Tanzania [44] and 1.4% in Rwanda [45] but lower than the 19.7%  
413 reported in Kenya [46] and 23.4% in the Democratic Republic of Congo [47]. As a potential  
414 risk factor for *T. solium* taeniasis, consumption of poorly cooked pork and pork with cysts was  
415 reported to be practiced in our study area, with men in particular being the most exposed to  
416 undercooked meat within the Eastern province of Zambia, translating into a higher taeniasis

417 prevalence among them [14]. Nevertheless, considering the predictors of taeniasis, we did not  
418 find any association between positivity for taeniasis and age or sex in our study area. This was  
419 also the case in comparable studies conducted within the Eastern province of Zambia [14], in  
420 Tanzania [44] and in studies conducted in other countries in Latin America [38–40,48,49]. In  
421 contrast, in a study conducted in Congo, age was found to be significantly associated with  
422 taeniasis, and the highest positivity was found in subjects belonging to the 5 – 10 years age  
423 group [47]. This association was also observed in studies conducted in Peru and Guatemala  
424 [39,40]. Our study excluded participants aged younger than 10 years, so we cannot predict what  
425 the outcome would have been had these been included. Nonetheless, it was observed that  
426 taeniasis prevalence both on copro Ag-ELISA and microscopy was lower in those aged below  
427 40 years. However, since all age groups are affected by taeniasis, intervention strategies such  
428 as MDA should target the entire population [5].

429 In addition to resulting in intestinal taeniasis and preserving the life cycle of *T. solium*, a  
430 tapeworm carrier also poses a risk for the development of human cysticercosis, resulting in  
431 even more severe health conditions, such as epilepsy. Transmission occurs either through  
432 autoinfection or transmission to other community members by ingesting infective  
433 eggs/proglottids. *T. solium* tapeworm proglottids were, for example, recovered from one of the  
434 taeniasis-positive participants whose trade was mainly herding cattle in the fields. With the  
435 non-availability of latrines in the fields and, in general, the non-use of latrines within the  
436 province, open defaecation is practiced [50,51]. Environmental contamination with tapeworm  
437 eggs is thus inevitable, leading to an increased exposure risk to infective eggs for both humans  
438 and pigs. The latter could also explain the high taeniasis prevalence recorded in our study  
439 community [14].

440 While the major strength of our study was the large sample size used to estimate the prevalence  
441 of intestinal helminths, including taeniasis, compared to previous studies within the Eastern  
442 province of Zambia, the study had some limitations. Among them were the few variables linked  
443 to people, pigs and the environment obtained to ascertain risk factors for intestinal  
444 helminthiasis and taeniasis. Another limitation is that quantification of the helminth eggs was  
445 not performed, and therefore, the intensity of helminth infection in our study population could  
446 not be ascertained. Additionally, participants were not asked if they had taken any anti-  
447 helminthic medication in the past three months prior to our study to have a true estimate of  
448 intestinal helminthiasis prevalence. The fact that only one stool sample was collected instead  
449 of three consecutive samples for microscopy could have led to the underestimation of intestinal  
450 parasite infections reported in our study.

## 451 **Conclusion**

452 Intestinal helminth infections, including taeniasis, most likely *T. solium* taeniasis and *S.*  
453 *mansoni*, are hyperendemic in the Chiparamba area of the Chipata district in the Eastern  
454 province of Zambia. While the estimates of prevalence may be lower in our study area  
455 compared to other districts within Zambia, they are still high enough to warrant public health  
456 interventions for surveillance and control. More work has to be done to ensure the enforcement  
457 of public health interventions for the control and elimination of these infections in rural parts  
458 of Zambia.

## 459 **Acknowledgements**

460 We would like to acknowledge the study participants from the Chiparamba community and the  
461 nurses, clinicians and community health workers from the Chiparamba clinic for making this  
462 study possible. We would also like to acknowledge Gasiano Hapooma and Catherine Hatuma,

463 the Laboratory Technicians from the Provincial Livestock and Fisheries Office, Chipata, for  
464 helping with sample processing during field work.

## 465 **Supplement**

466 **S1 Fig. Percent distribution of participants by village in the study area. (TIF)**

467 **S1 Table. Strobe checklist. (DOCX)**

## 468 **Funding**

469 This study was funded by the German Federal Ministry of Education and Research (BMBF)  
470 under CYSTINET-Africa grant numbers 81203604 (CSS) and 01KA1618 (ASW). The funder  
471 had no role in the design of the study, data collection, analysis and interpretation or in writing  
472 the manuscript.

## 473 **Availability of data and materials**

474 The data supporting the conclusions of this article are included within the article. Raw datasets  
475 used and/or analysed during the current study are available from the corresponding author on  
476 reasonable request.

## 477 **Competing interests**

478 The authors declare that they have no competing interests.

## 479 **Author contributions**

480 **Conceptualization:** Gideon Zulu, Chummy Sikasunge, Kabemba E. Mwape, Andrea S.

481 Winkler, Isaac K. Phiri.

482 **Data curation:** Gideon Zulu.

483 **Formal analysis:** Gideon Zulu, Martin Simunza.

484 **Funding acquisition:** Chummy Sikasunge, Andrea S. Winkler.

485 **Investigation:** Gideon Zulu, Alex Hachangu, Maxwell Masuku, Mwelwa Chembensofu.

486 **Methodology:** Gideon Zulu, Chummy Sikasunge, Tamara M. Welte, Kabemba E. Mwape,

487 Andrea S. Winkler, Isaac K. Phiri.

488 **Project administration:** Gideon Zulu, Chummy Sikasunge.

489 **Resources:** Chummy Sikasunge.

490 **Software:** Gideon Zulu, Martin Simunza,

491 **Supervision:** Andrea S. Winkler, Isaac K. Phiri.

492 **Validation:** Gideon Zulu, Tamara M. Welte, Kabemba E. Mwape, Andrea S. Winkler, Isaac

493 K. Phiri,

494 **Visualization:** Gideon Zulu, Isaac K. Phiri.

495 **Writing** – original draft: Gideon Zulu

496 **Writing** – review & editing: Gideon Zulu, Chummy Sikasunge, Tamara M. Welte, Martin

497 Simunza, Dominik Stelzle, Veronika Schmidt, Alex Hachangu, Wilbroad Mutale, Maxwell

498 Masuku, Mwelwa Chembensofu, Clarissa Prazeres da Costa, Kabemba E. Mwape, Andrea S.  
499 Winkler, Isaac K. Phiri.

## 500 **References**

- 501 [1] WHO. Fact sheet on soil-transmitted helminth infections. 2023.
- 502 [2] Booth M. The role of residential location in apparent helminth and malaria  
503 associations. *Trends Parasitol* 2006;22:359–62.  
504 <https://doi.org/10.1016/j.pt.2006.06.007>.
- 505 [3] Bundy DAP, Walson JL, Watkins KL. Worms, wisdom, and wealth: Why deworming  
506 can make economic sense. *Trends Parasitol* 2013;29:142–8.  
507 <https://doi.org/10.1016/j.pt.2012.12.003>.
- 508 [4] Bethony J, Brooker S, Albonico M, Geiger SM, Loukas A, Diemert D, et al. Soil-  
509 transmitted helminth infections: ascariasis, trichuriasis, and hookworm. *Lancet*  
510 2006;367:1521–32. [https://doi.org/10.1016/S0140-6736\(06\)68653-4](https://doi.org/10.1016/S0140-6736(06)68653-4).
- 511 [5] WHO. Investing to overcome the global impact of neglected tropical diseases: third  
512 WHO report on neglected diseases 2015. Invest to Overcome Glob Impact Neglected  
513 Trop Dis Third WHO Rep Neglected Dis 2015:191. [https://doi.org/ISBN 978 92 4](https://doi.org/ISBN%20978%2092%2041564861)  
514 156486 1.
- 515 [6] WHO. Prevention and control of schistosomiasis and soil-transmitted helminthiasis -  
516 Report of a WHO Expert Committee. *World Health Organ Tech Rep Ser* 2002;912:i-  
517 vi, 1–57, back cover.
- 518 [7] Mwape KE, Phiri IK, Praet N, Speybroeck N, Muma JB, Dorny P, et al. The Incidence  
519 of Human Cysticercosis in a Rural Community of Eastern Zambia. *PLoS Negl Trop*  
520 *Dis* 2013;7:e2142. <https://doi.org/10.1371/journal.pntd.0002142>.
- 521 [8] Phiri IK, Dorny P, Gabriel S, Willingham AL, Speybroeck N, Vercruyssen J. The  
522 prevalence of porcine cysticercosis in Eastern and Southern provinces of Zambia. *Vet*  
523 *Parasitol* 2002;108:31–9. [https://doi.org/10.1016/S0304-4017\(02\)00165-6](https://doi.org/10.1016/S0304-4017(02)00165-6).
- 524 [9] Sciutto E, Fragoso G, Fleury A, Lacleste JP, Sotelo J, Aluja A, et al. *Taenia solium*  
525 disease in humans and pigs: An ancient parasitosis disease rooted in developing  
526 countries and emerging as a major health problem of global dimensions. *Microbes*  
527 *Infect* 2000;2:1875–90. [https://doi.org/10.1016/S1286-4579\(00\)01336-8](https://doi.org/10.1016/S1286-4579(00)01336-8).
- 528 [10] Mafojane NA, Appleton CC, Kreczek RC, Michael LM, Willingham AL. The current  
529 status of neurocysticercosis in Eastern and Southern Africa. *Acta Trop.*, vol. 87,  
530 Elsevier; 2003, p. 25–33. [https://doi.org/10.1016/S0001-706X\(03\)00052-4](https://doi.org/10.1016/S0001-706X(03)00052-4).
- 531 [11] Johansen MV, Trevisan C, Gabriël S, Magnussen P, Braae UC. Are we ready for  
532 *Taenia solium* cysticercosis elimination in sub-Saharan Africa? *Parasitology*  
533 2017;144:59–64. <https://doi.org/10.1017/S0031182016000500>.



- 534 [12] Sikasunge CS, Phiri IK, Phiri AM, Siziya S, Dorny P, Willingham AL. Prevalence of  
535 *Taenia solium* porcine cysticercosis in the Eastern, Southern and Western provinces of  
536 Zambia. *Vet J* 2008;176:240–4. <https://doi.org/10.1016/j.tvjl.2007.02.030>.
- 537 [13] Chembensofu M, Mwape KE, Van Damme I, Hobbs E, Phiri IK, Masuku M, et al. Re-  
538 visiting the detection of porcine cysticercosis based on full carcass dissections of  
539 naturally *Taenia solium* infected pigs. *Parasites and Vectors* 2017;10.  
540 <https://doi.org/10.1186/s13071-017-2520-y>.
- 541 [14] Mwape KE, Phiri IK, Praet N, Muma JB, Zulu G, van den Bossche P, et al. *Taenia*  
542 *solium* infections in a rural area of Eastern Zambia-A community based study. *PLoS*  
543 *Negl Trop Dis* 2012;6:1–9. <https://doi.org/10.1371/journal.pntd.0001594>.
- 544 [15] Halwindi H, Magnussen P, Olsen A, Lisulo M. Potential contribution of adult  
545 populations to the maintenance of schistosomiasis and soil-transmitted helminth  
546 infections in the Siavonga and Mazabuka Districts of Zambia. *J Biosoc Sci*  
547 2017;49:265–75. <https://doi.org/10.1017/S0021932016000201>.
- 548 [16] Siwila J, Phiri IGK, Enemark HL, Nchito M, Olsen A. Intestinal helminths and  
549 protozoa in children in pre-schools in Kafue district, Zambia. *Trans R Soc Trop Med*  
550 *Hyg* 2010;104:122–8. <https://doi.org/10.1016/j.trstmh.2009.07.024>.
- 551 [17] Tembo S, Mubita P, Sitali L, Zgambo J. Prevalence, Intensity, and Factors Associated  
552 with Soil-Transmitted Helminths Infection among Children in Zambia: A Cross-  
553 sectional Study. *Open Public Health J* 2019;12:284–93.  
554 <https://doi.org/10.2174/1874944501912010284>.
- 555 [18] Mwale K. Intestinal Infestations in Under-Five Children in Zambia. *Int J MCH AIDS*  
556 2016;4. <https://doi.org/10.21106/ijma.62>.
- 557 [19] Acharya T. Formal Ether Sedimentation techniques - microbeonline.  
558 MicrobeonlineCom 2012. [https://microbeonline.com/formal-ether-sedimentation-](https://microbeonline.com/formal-ether-sedimentation-techniques/#google_vignette)  
559 [techniques/#google\\_vignette](https://microbeonline.com/formal-ether-sedimentation-techniques/#google_vignette) (accessed May 15, 2023).
- 560 [20] Ritchie LS. An Ether Sedimentation Technique for Routine Stool Examinations. *Bull*  
561 *U S Army Med Dep* 1948;8:326.
- 562 [21] Allan JC, Craig PS, Avila G, Flisser A, Noval JG. Immunodiagnosis of taeniasis by  
563 coproantigen detection. *Parasitology* 1990;101:473–7.  
564 <https://doi.org/10.1017/S0031182000060686>.
- 565 [22] Humanitarian Response. Kobo Toolbox. Cambridge, MA, USA. 2015.  
566 <https://www.kobotoolbox.org/>.
- 567 [23] Field A. *Discovering statistics using IBM SPSS statistics*. vol. 58. 2013.
- 568 [24] Fawad K. Binary Logistic Regression Analysis in SPSS. ReserachWithFawad 2022.  
569 [https://researchwithfawad.com/index.php/lp-courses/data-analysis-using-spss/binary-](https://researchwithfawad.com/index.php/lp-courses/data-analysis-using-spss/binary-logistic-regression-analysis-in-spss/)  
570 [logistic-regression-analysis-in-spss/](https://researchwithfawad.com/index.php/lp-courses/data-analysis-using-spss/binary-logistic-regression-analysis-in-spss/) (accessed May 3, 2023).
- 571 [25] Shawa ST, Mwase ET, Simonsen PE. Surveys for Schistosomiasis and Soil  
572 Transmitted Helminths in Luangwa, Kalabo and Serenje Districts of Zambia. *Med J*

- 573 Zambia 2014;41:174-180–180. <https://doi.org/10.4314/mjz.v41i4>.
- 574 [26] Lwambo NJS, Bundy DAP, Medley GFH. A new approach to morbidity risk  
575 assessment in hookworm endemic communities. *Epidemiol Infect* 1992;108:469–81.  
576 <https://doi.org/10.1017/S0950268800049980>.
- 577 [27] Mekonnen Z, Suleman S, Biruksew A, Tefera T, Chelkeba L. Intestinal polyparasitism  
578 with special emphasis to soil-transmitted helminths among residents around Gilgel  
579 Gibe Dam, Southwest Ethiopia: a community based survey. *BMC Public Health*  
580 2016;16:1–7. <https://doi.org/10.1186/s12889-016-3859-2>.
- 581 [28] Langbang D, Dhodapkar R, Parija S, Premarajan K, Rajkumari N. Prevalence of  
582 intestinal parasites among rural and urban population in Puducherry, South India - A  
583 community-based study. *J Fam Med Prim Care* 2019;8:1607.  
584 [https://doi.org/10.4103/jfmpe.jfmpe\\_196\\_19](https://doi.org/10.4103/jfmpe.jfmpe_196_19).
- 585 [29] Samie A, Guerrant RL, Barrett L, Bessong PO, Igumbor EO, Obi CL. Prevalence of  
586 intestinal parasitic and bacterial pathogens in diarrhoeal and non-diarrhoeal human  
587 stools from vhembe district, south africa. *J Heal Popul Nutr* 2009;27:739–45.  
588 <https://doi.org/10.3329/jhpn.v27i6.4325>.
- 589 [30] Pullan RL, Brooker SJ. The global limits and population at risk of soil-transmitted  
590 helminth infections in 2010. *Parasites and Vectors* 2012;5:81.  
591 <https://doi.org/10.1186/1756-3305-5-81>.
- 592 [31] Dunn JC, Bettis AA, Wyine NY, Lwin AMM, Tun A, Maung NS, et al. Soil-  
593 transmitted helminth reinfection four and six months after mass drug administration:  
594 Results from the delta region of Myanmar. *PLoS Negl Trop Dis* 2019;13:e0006591.  
595 <https://doi.org/10.1371/journal.pntd.0006591>.
- 596 [32] Makaula P, Kayuni SA, Mamba KC, Bongololo G, Funsanani M, Musaya J, et al. An  
597 assessment of implementation and effectiveness of mass drug administration for  
598 prevention and control of schistosomiasis and soil-transmitted helminths in selected  
599 southern Malawi districts. *BMC Health Serv Res* 2022;22:517.  
600 <https://doi.org/10.1186/s12913-022-07925-3>.
- 601 [33] Kalinda C, Chimbari MJ, Mukaratirwa S. Schistosomiasis in Zambia: A systematic  
602 review of past and present experiences. *Infect Dis Poverty* 2018;7:1–10.  
603 <https://doi.org/10.1186/s40249-018-0424-5>.
- 604 [34] Zargaran E, Silwambe G, Baboo S, Yarmoshuk A. Analysis of the Knowledge Base  
605 and evaluation of risk factors of schistosomiasis in rural Zambia. *Univ Toronto Med J*  
606 2009;86:71–5.
- 607 [35] Mutengo MM, Mwansa JCL, Mduluzza T, Sianongo S, Chipeta J. High *Schistosoma*  
608 *mansoni* disease burden in a rural district of Western Zambia. *Am J Trop Med Hyg*  
609 2014;91:965–72. <https://doi.org/10.4269/ajtmh.13-0612>.
- 610 [36] Monde C, Syampungani S, van den Brink PJ. Natural and human induced factors  
611 influencing the abundance of *Schistosoma* host snails in Zambia. *Environ Monit*  
612 *Assess* 2016;188. <https://doi.org/10.1007/s10661-016-5351-y>.

- 613 [37] Strahan R, Chiyesu KO, Schneider-Kolsky ME. Ultrasound study of liver disease  
614 caused by *Schistosoma mansoni* in rural Zambian schoolchildren. *J Med Imaging*  
615 *Radiat Oncol* 2012;56:390–7. <https://doi.org/10.1111/j.1754-9485.2012.02371.x>.
- 616 [38] Cruz M, Davis A, Dixon H, Pawlowski ZS, Proano J. Operational studies on the  
617 control of *Taenia solium* taeniasis/cysticercosis in Ecuador. *Bull World Health Organ*  
618 1989;67:401–7.
- 619 [39] García HH, Gilman RH, Gonzalez AE, Verastegui M, Rodriguez S, Gavidia C, et al.  
620 Hyperendemic human and porcine *Taenia solium* infection in Perú. *Am J Trop Med*  
621 *Hyg* 2003;68:268–75. <https://doi.org/10.4269/ajtmh.2003.68.268>.
- 622 [40] Allan JC, Velasquez-Tohom M, Garcia-Noval J, Torres-Alvarez R, Yurrita P, Fletes C,  
623 et al. Epidemiology of intestinal taeniasis in four, rural, Guatemalan communities. *Ann*  
624 *Trop Med Parasitol* 1996;90:157–65.  
625 <https://doi.org/10.1080/00034983.1996.11813039>.
- 626 [41] Allan JC, Wilkins PP, Tsang VCW, Craig PS. Immunodiagnostic tools for taeniasis.  
627 *Acta Trop* 2003;87:87–93. [https://doi.org/10.1016/S0001-706X\(03\)00059-7](https://doi.org/10.1016/S0001-706X(03)00059-7).
- 628 [42] Praet N, Verweij JJ, Mwape KE, Phiri IK, Muma JB, Zulu G, et al. Bayesian  
629 modelling to estimate the test characteristics of coprology, coproantigen ELISA and a  
630 novel real-time PCR for the diagnosis of taeniasis. *Trop Med Int Heal* 2013;18:608–  
631 14. <https://doi.org/10.1111/tmi.12089>.
- 632 [43] Dorny P, Phiri I, Gabriel S, Speybroeck N, Vercruyse J. A sero-epidemiological study  
633 of bovine cysticercosis in Zambia. *Vet Parasitol* 2002;104:211–5.  
634 [https://doi.org/10.1016/S0304-4017\(01\)00634-3](https://doi.org/10.1016/S0304-4017(01)00634-3).
- 635 [44] Mwanjali G, Kihamia C, Kakoko DVC, Lekule F, Ngowi H, Johansen MV, et al.  
636 Prevalence and Risk Factors Associated with Human *Taenia Solium* Infections in  
637 Mbozi District, Mbeya Region, Tanzania. *PLoS Negl Trop Dis* 2013;7:e2102.  
638 <https://doi.org/10.1371/journal.pntd.0002102>.
- 639 [45] Acosta Soto L, Parker LA, Irisarri-Gutiérrez MJ, Bustos JA, Castillo Y, Perez E, et al.  
640 Evidence for Transmission of *Taenia solium* Taeniasis/Cysticercosis in a Rural Area of  
641 Northern Rwanda. *Front Vet Sci* 2021;8:237.  
642 <https://doi.org/10.3389/fvets.2021.645076>.
- 643 [46] Fèvre EM, de Glanville WA, Thomas LF, Cook EAJ, Kariuki S, Wamae CN. An  
644 integrated study of human and animal infectious disease in the Lake Victoria crescent  
645 small-holder crop-livestock production system, Kenya. *BMC Infect Dis* 2017;17:1–14.  
646 <https://doi.org/10.1186/s12879-017-2559-6>.
- 647 [47] Madinga J, Kanobana K, Lukanu P, Abatih E, Baloji S, Linsuke S, et al. Geospatial  
648 and age-related patterns of *Taenia solium* taeniasis in the rural health zone of Kimpese,  
649 Democratic Republic of Congo. *Acta Trop* 2017;165:100–9.  
650 <https://doi.org/10.1016/j.actatropica.2016.03.013>.
- 651 [48] Rodriguez-Canul R, Fraser A, Allan JC, Dominguez-Alpizar JL, Argaez-Rodriguez F,  
652 Craig PS. Epidemiological study of *Taenia solium* taeniasis/cysticercosis in a rural  
653 village in Yucatan state, Mexico. *Ann Trop Med Parasitol* 1999;93:57–67.

654 <https://doi.org/10.1080/00034989958807>.

655 [49] Sánchez AL, Lindbäck J, Schantz PM, Sone M, Sakai H, Medina MT, et al. A  
656 population-based, case-control study of *Taenia solium* taeniasis and cysticercosis.  
657 *Ann Trop Med Parasitol* 1999;93:247–58.  
658 <https://doi.org/10.1080/00034983.1999.11813420>.

659 [50] Bulaya C, Mwape KE, Michelo C, Sikasunge CS, Makungu C, Gabriel S, et al.  
660 Preliminary evaluation of Community-Led Total Sanitation for the control of *Taenia*  
661 *solium* cysticercosis in Katete District of Zambia. *Vet Parasitol* 2015;207:241–8.  
662 <https://doi.org/10.1016/j.vetpar.2014.12.030>.

663 [51] Thys S, Mwape KE, Lefèvre P, Dorny P, Marcotty T, Phiri AM, et al. Why Latrines  
664 Are Not Used: Communities’ Perceptions and Practices Regarding Latrines in a *Taenia*  
665 *solium* Endemic Rural Area in Eastern Zambia. *PLoS Negl Trop Dis*  
666 2015;9:e0003570. <https://doi.org/10.1371/journal.pntd.0003570>.

667

668 **S1 Fig. Percent distribution of participants by village in the Chiparamba area of Chipata**  
669 **district, Eastern province.**

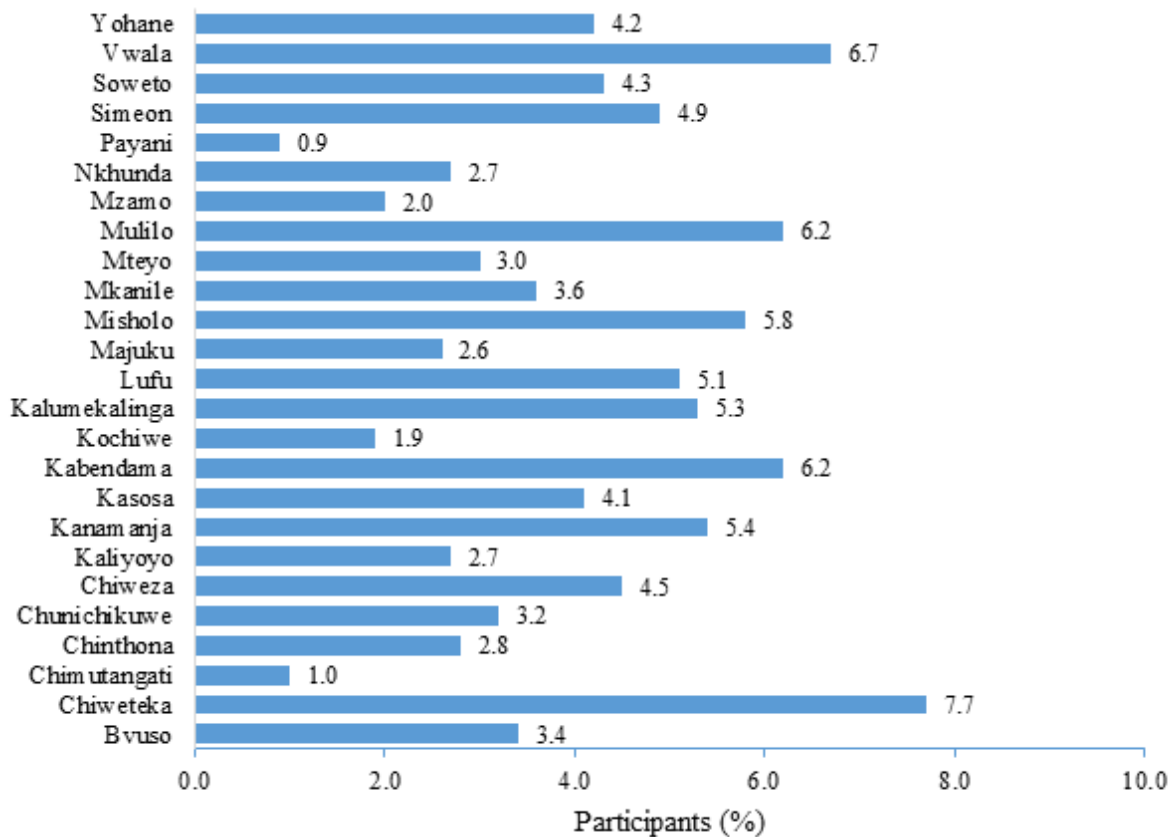

670

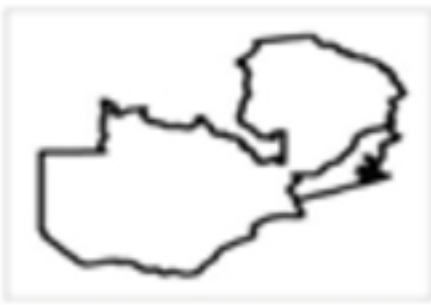

© Kurupanta 2012

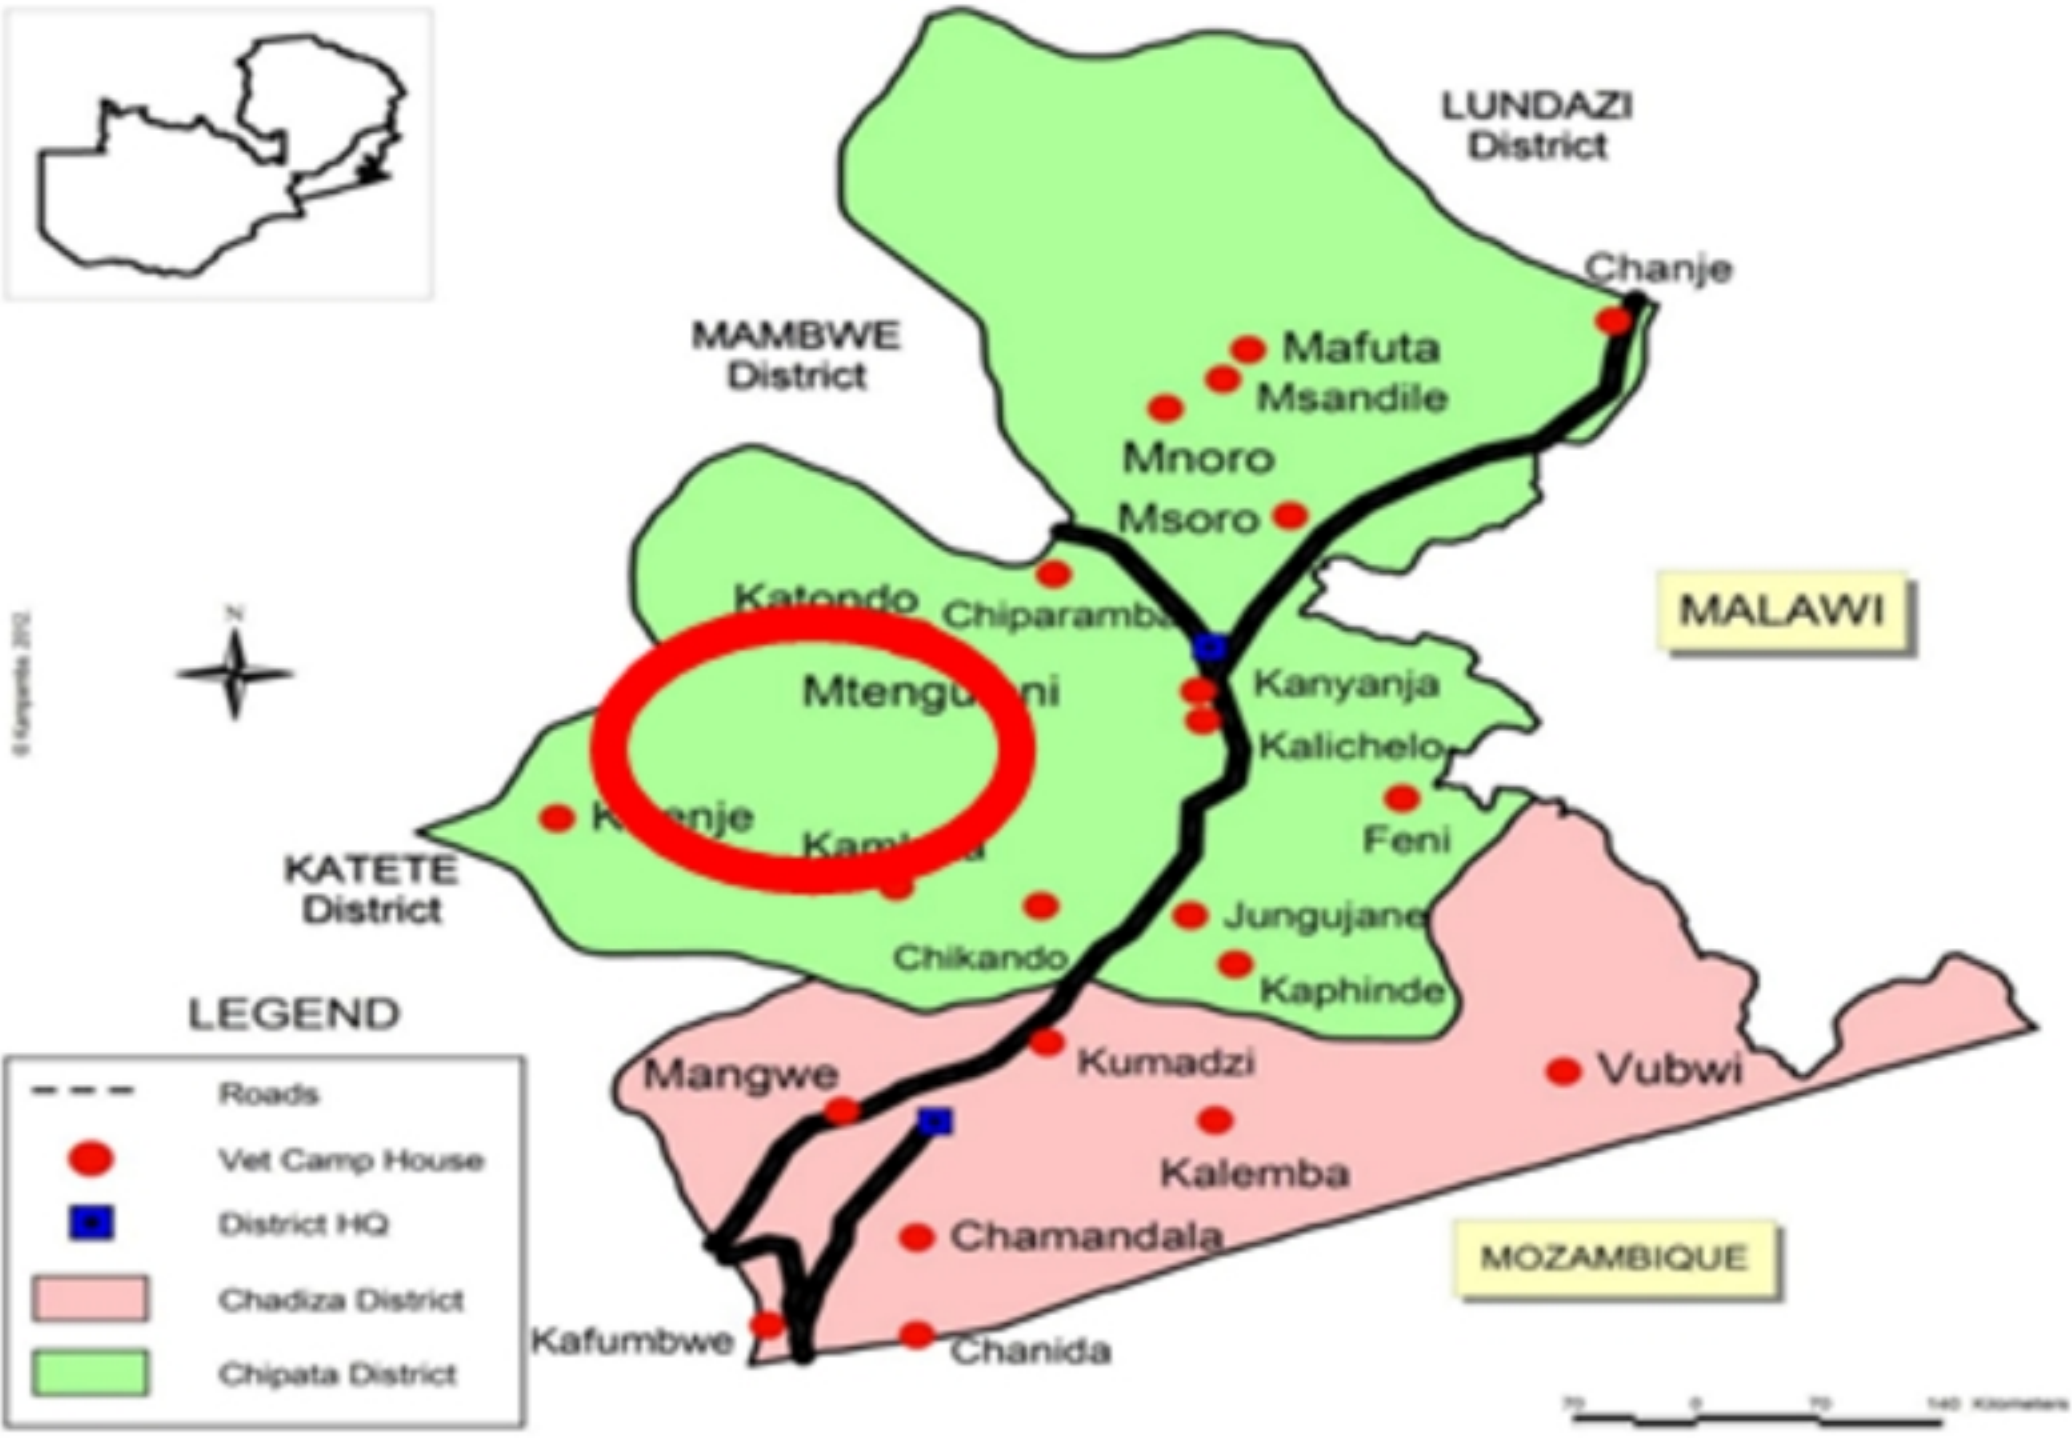

Fig 1

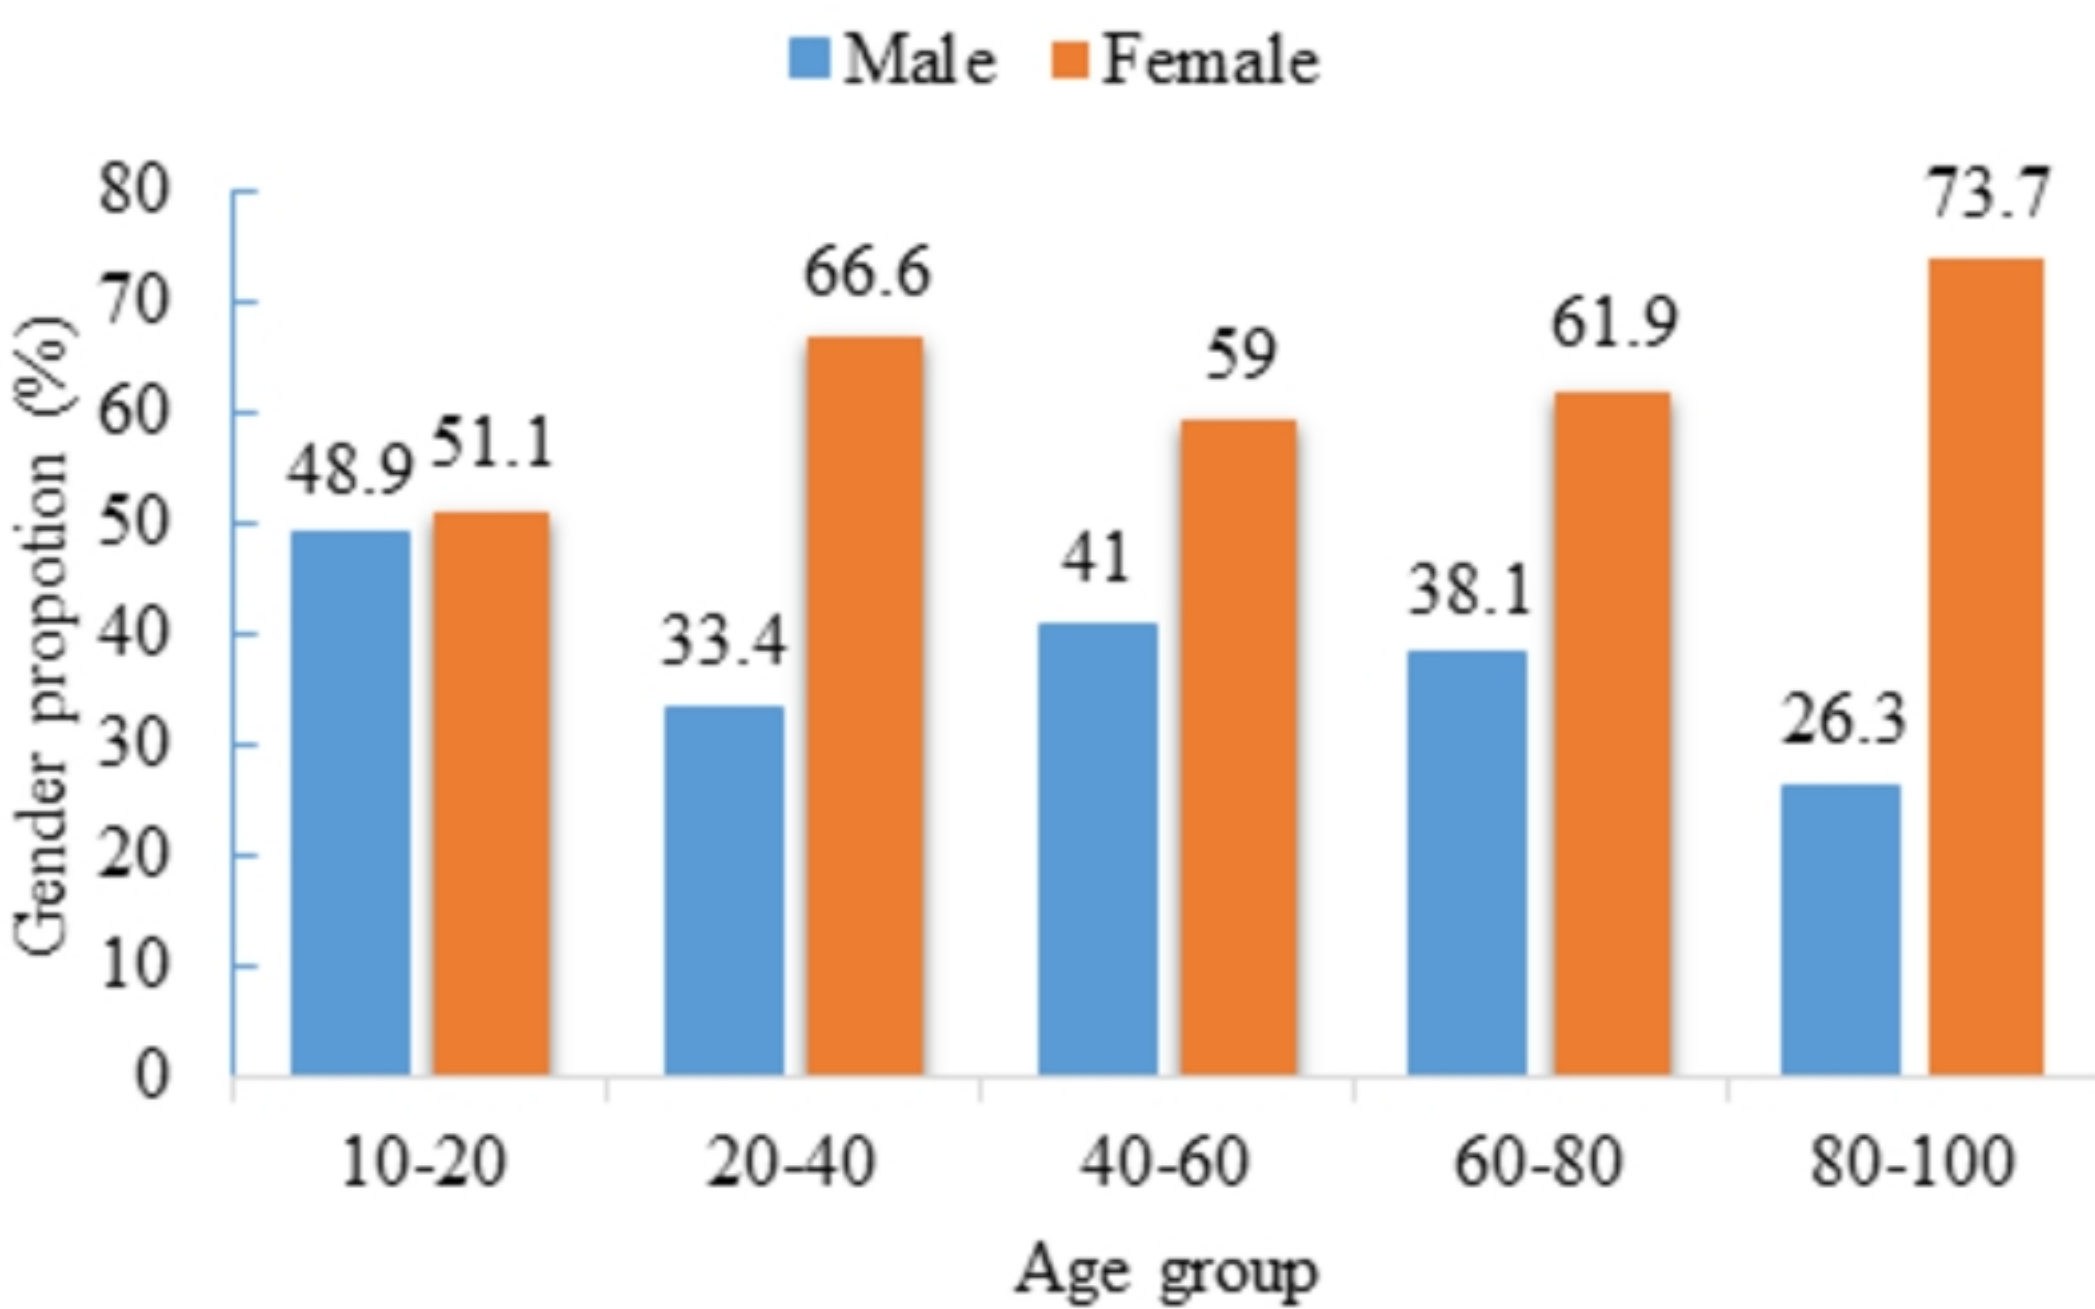

Fig 2

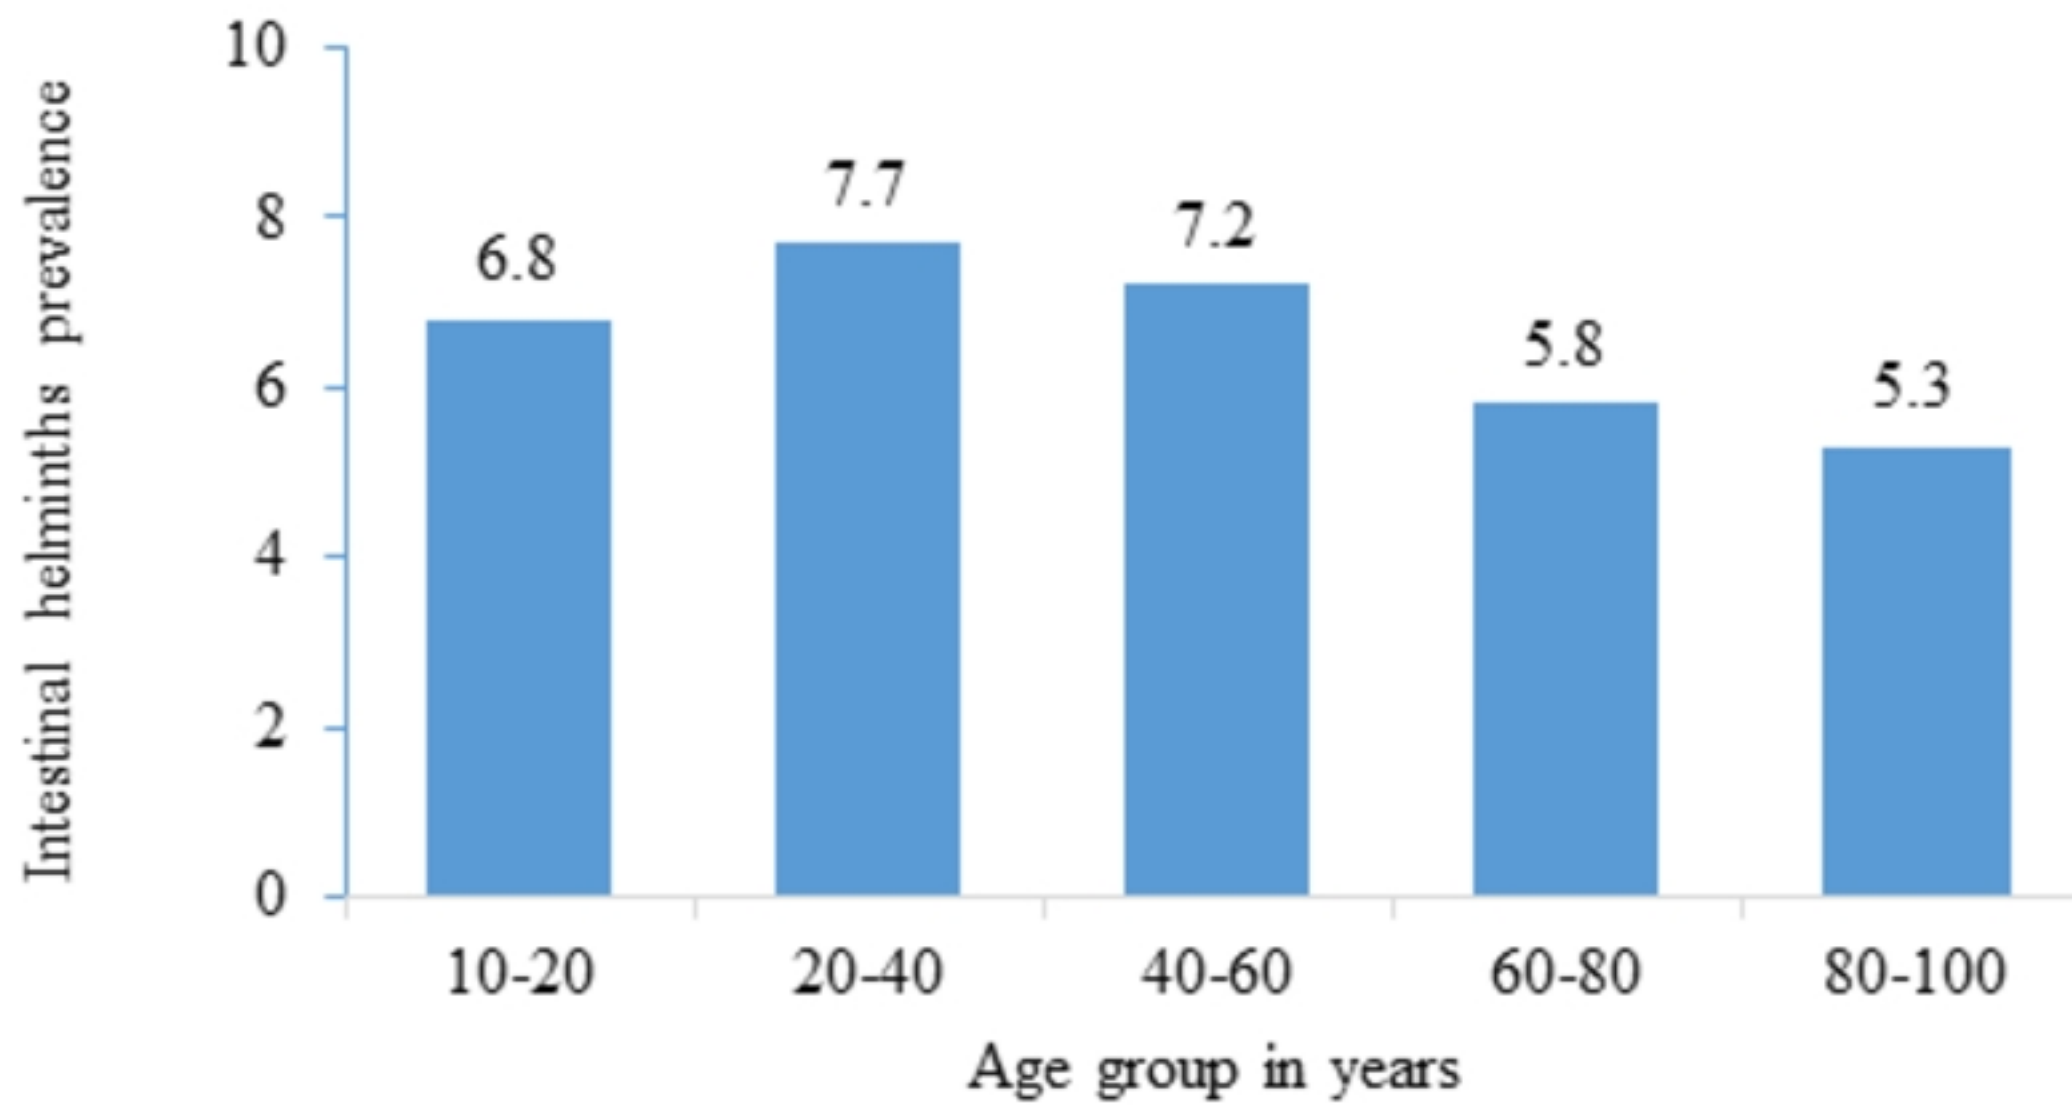

Fig 3

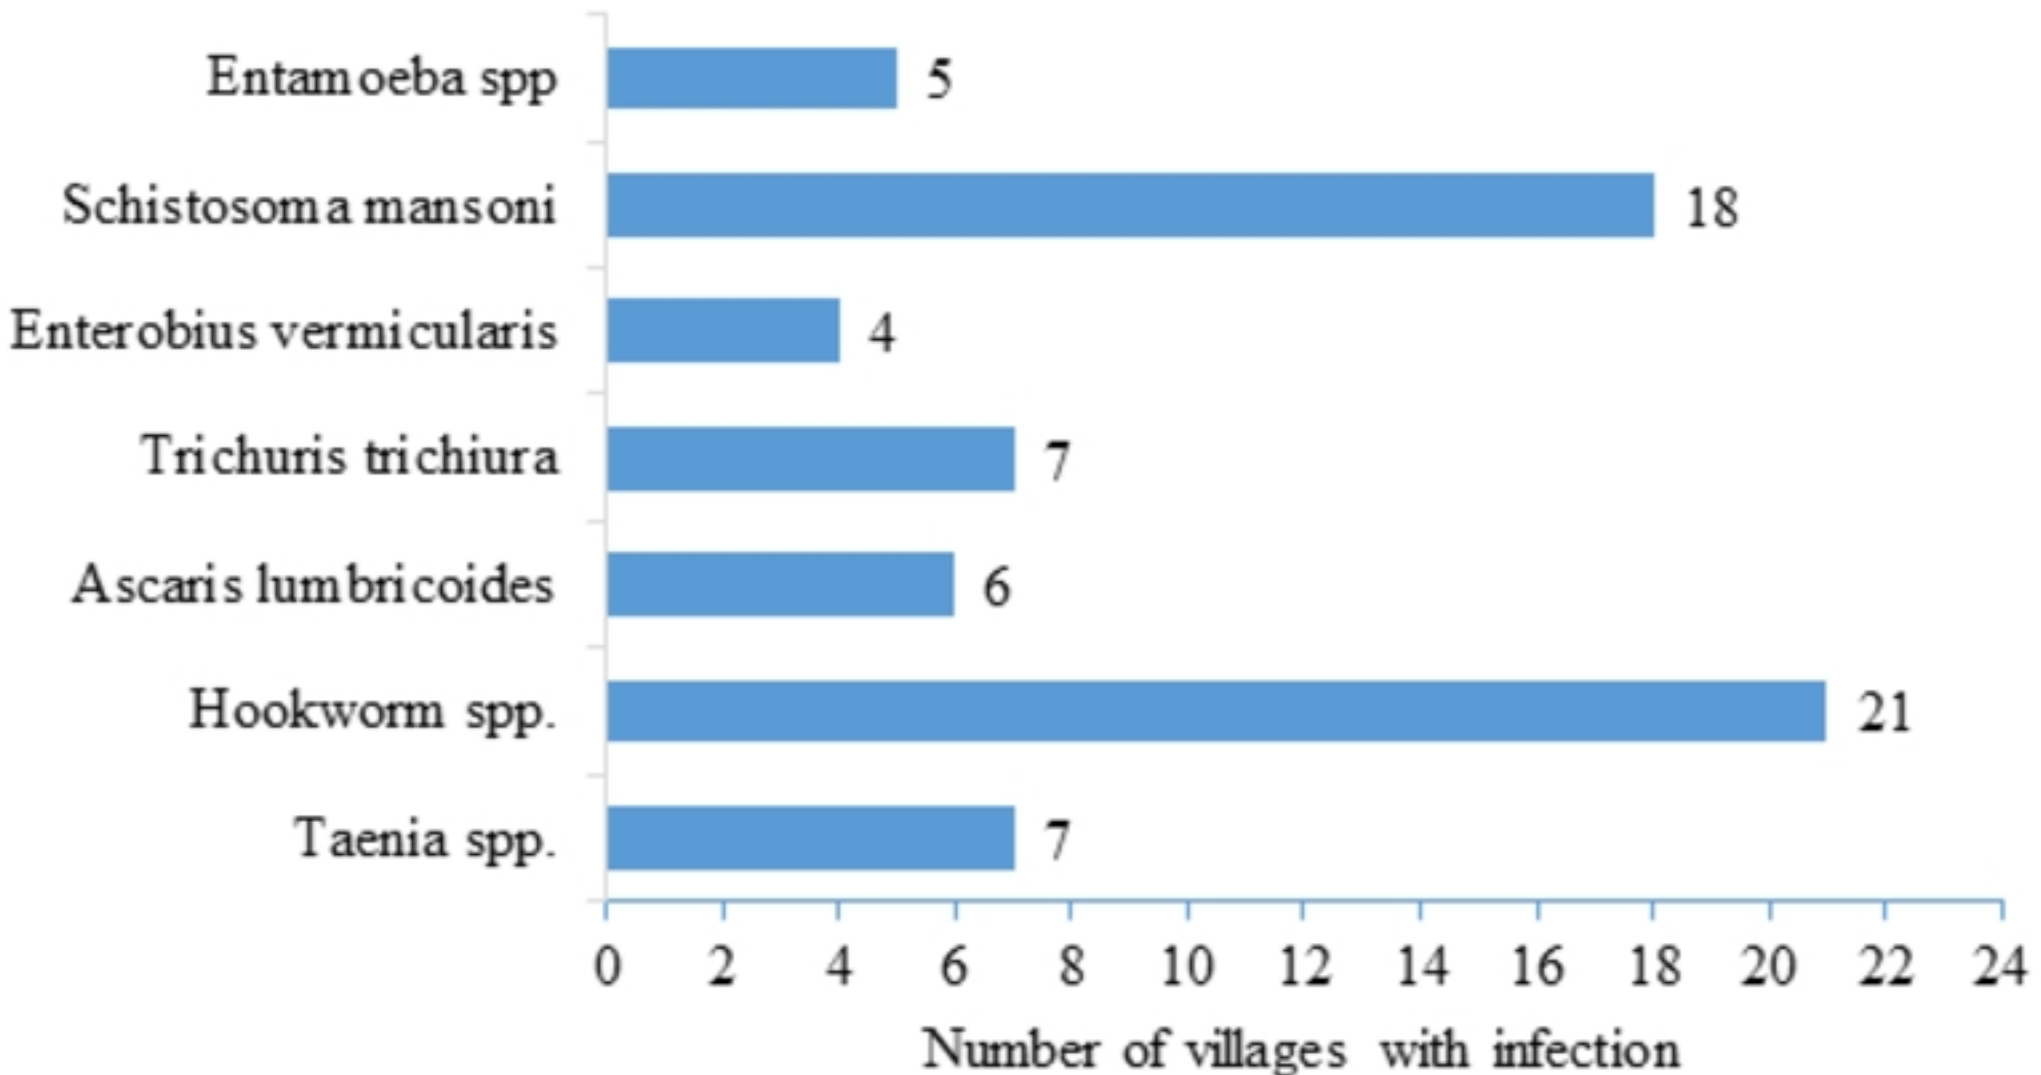

Fig 4



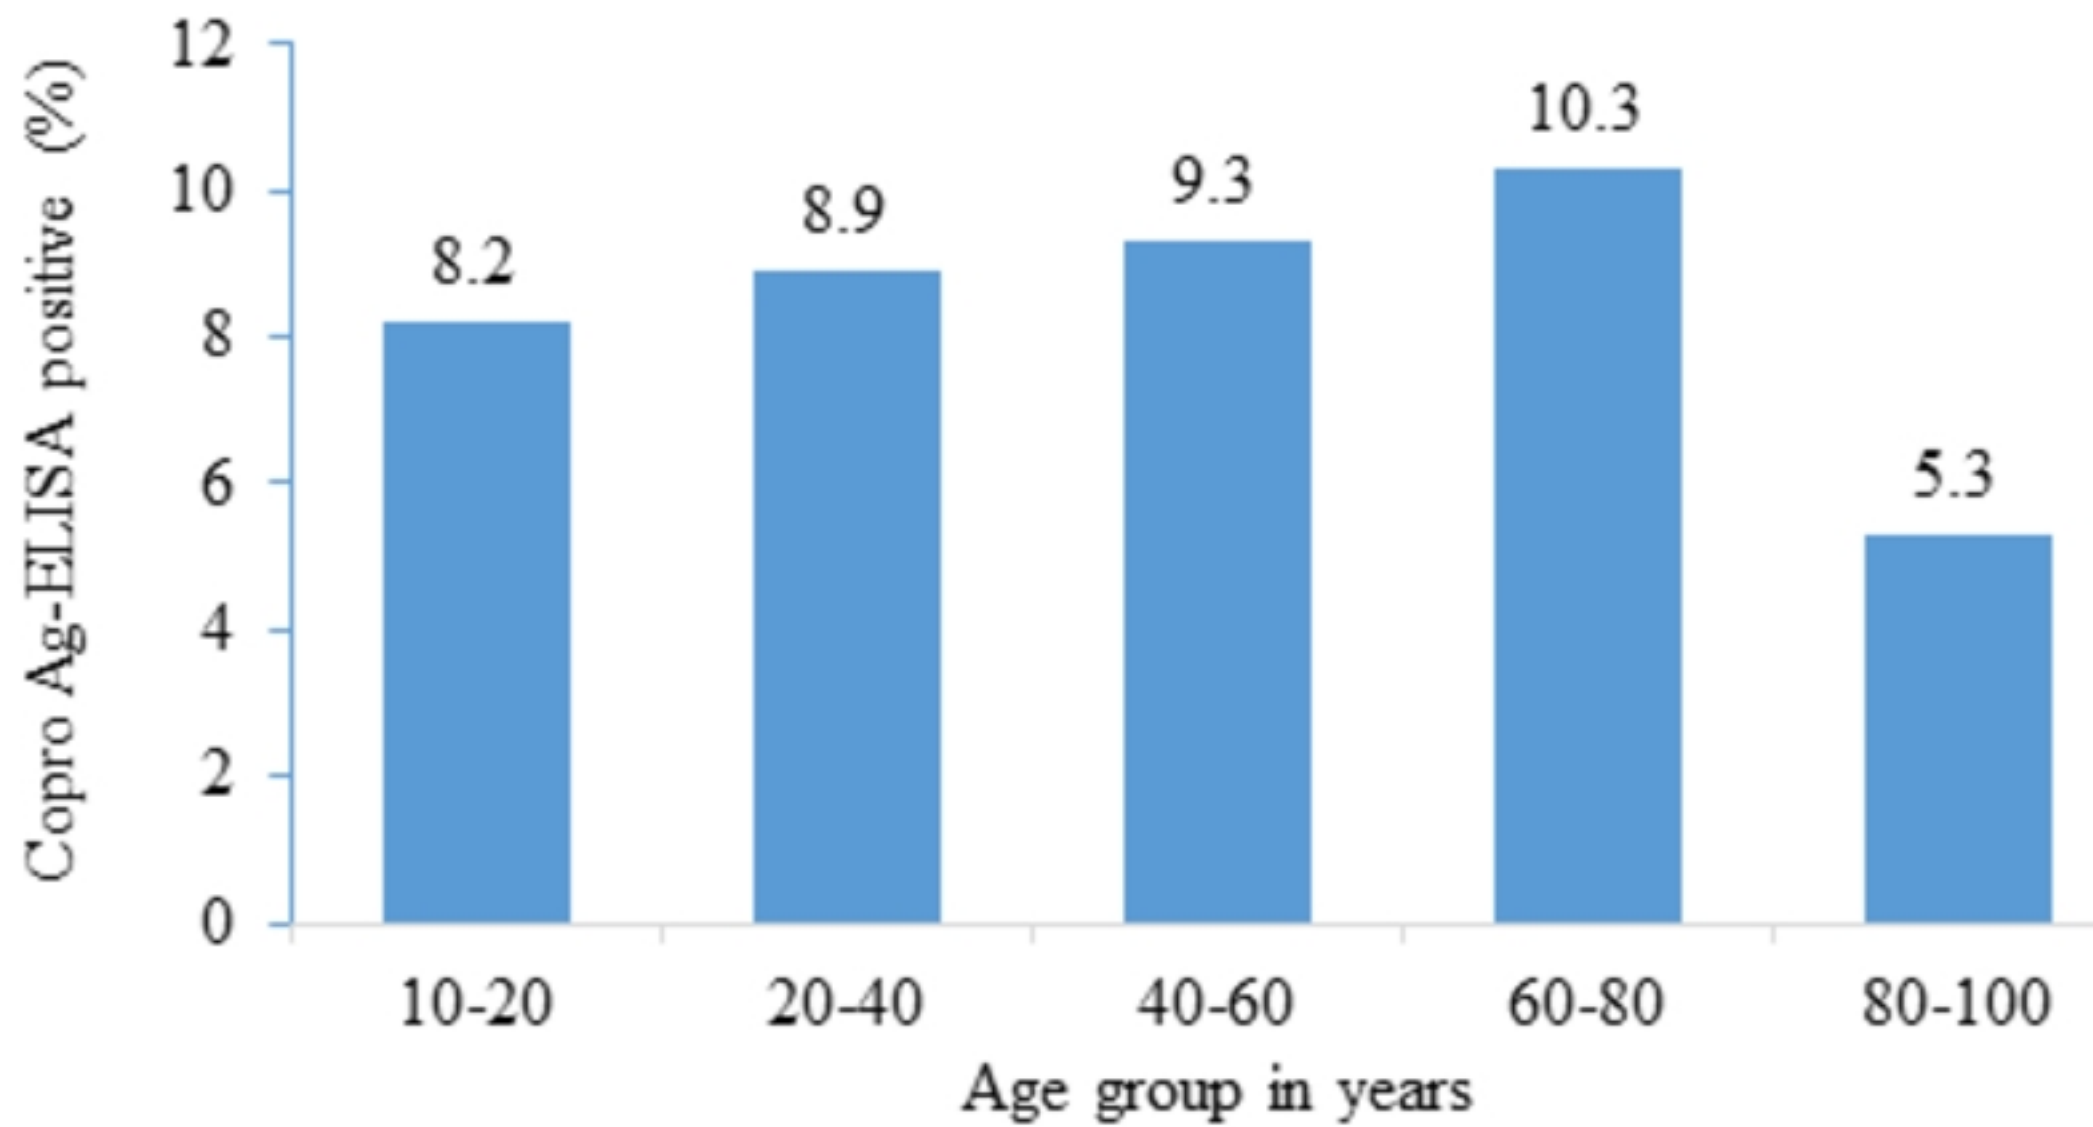

Fig 5

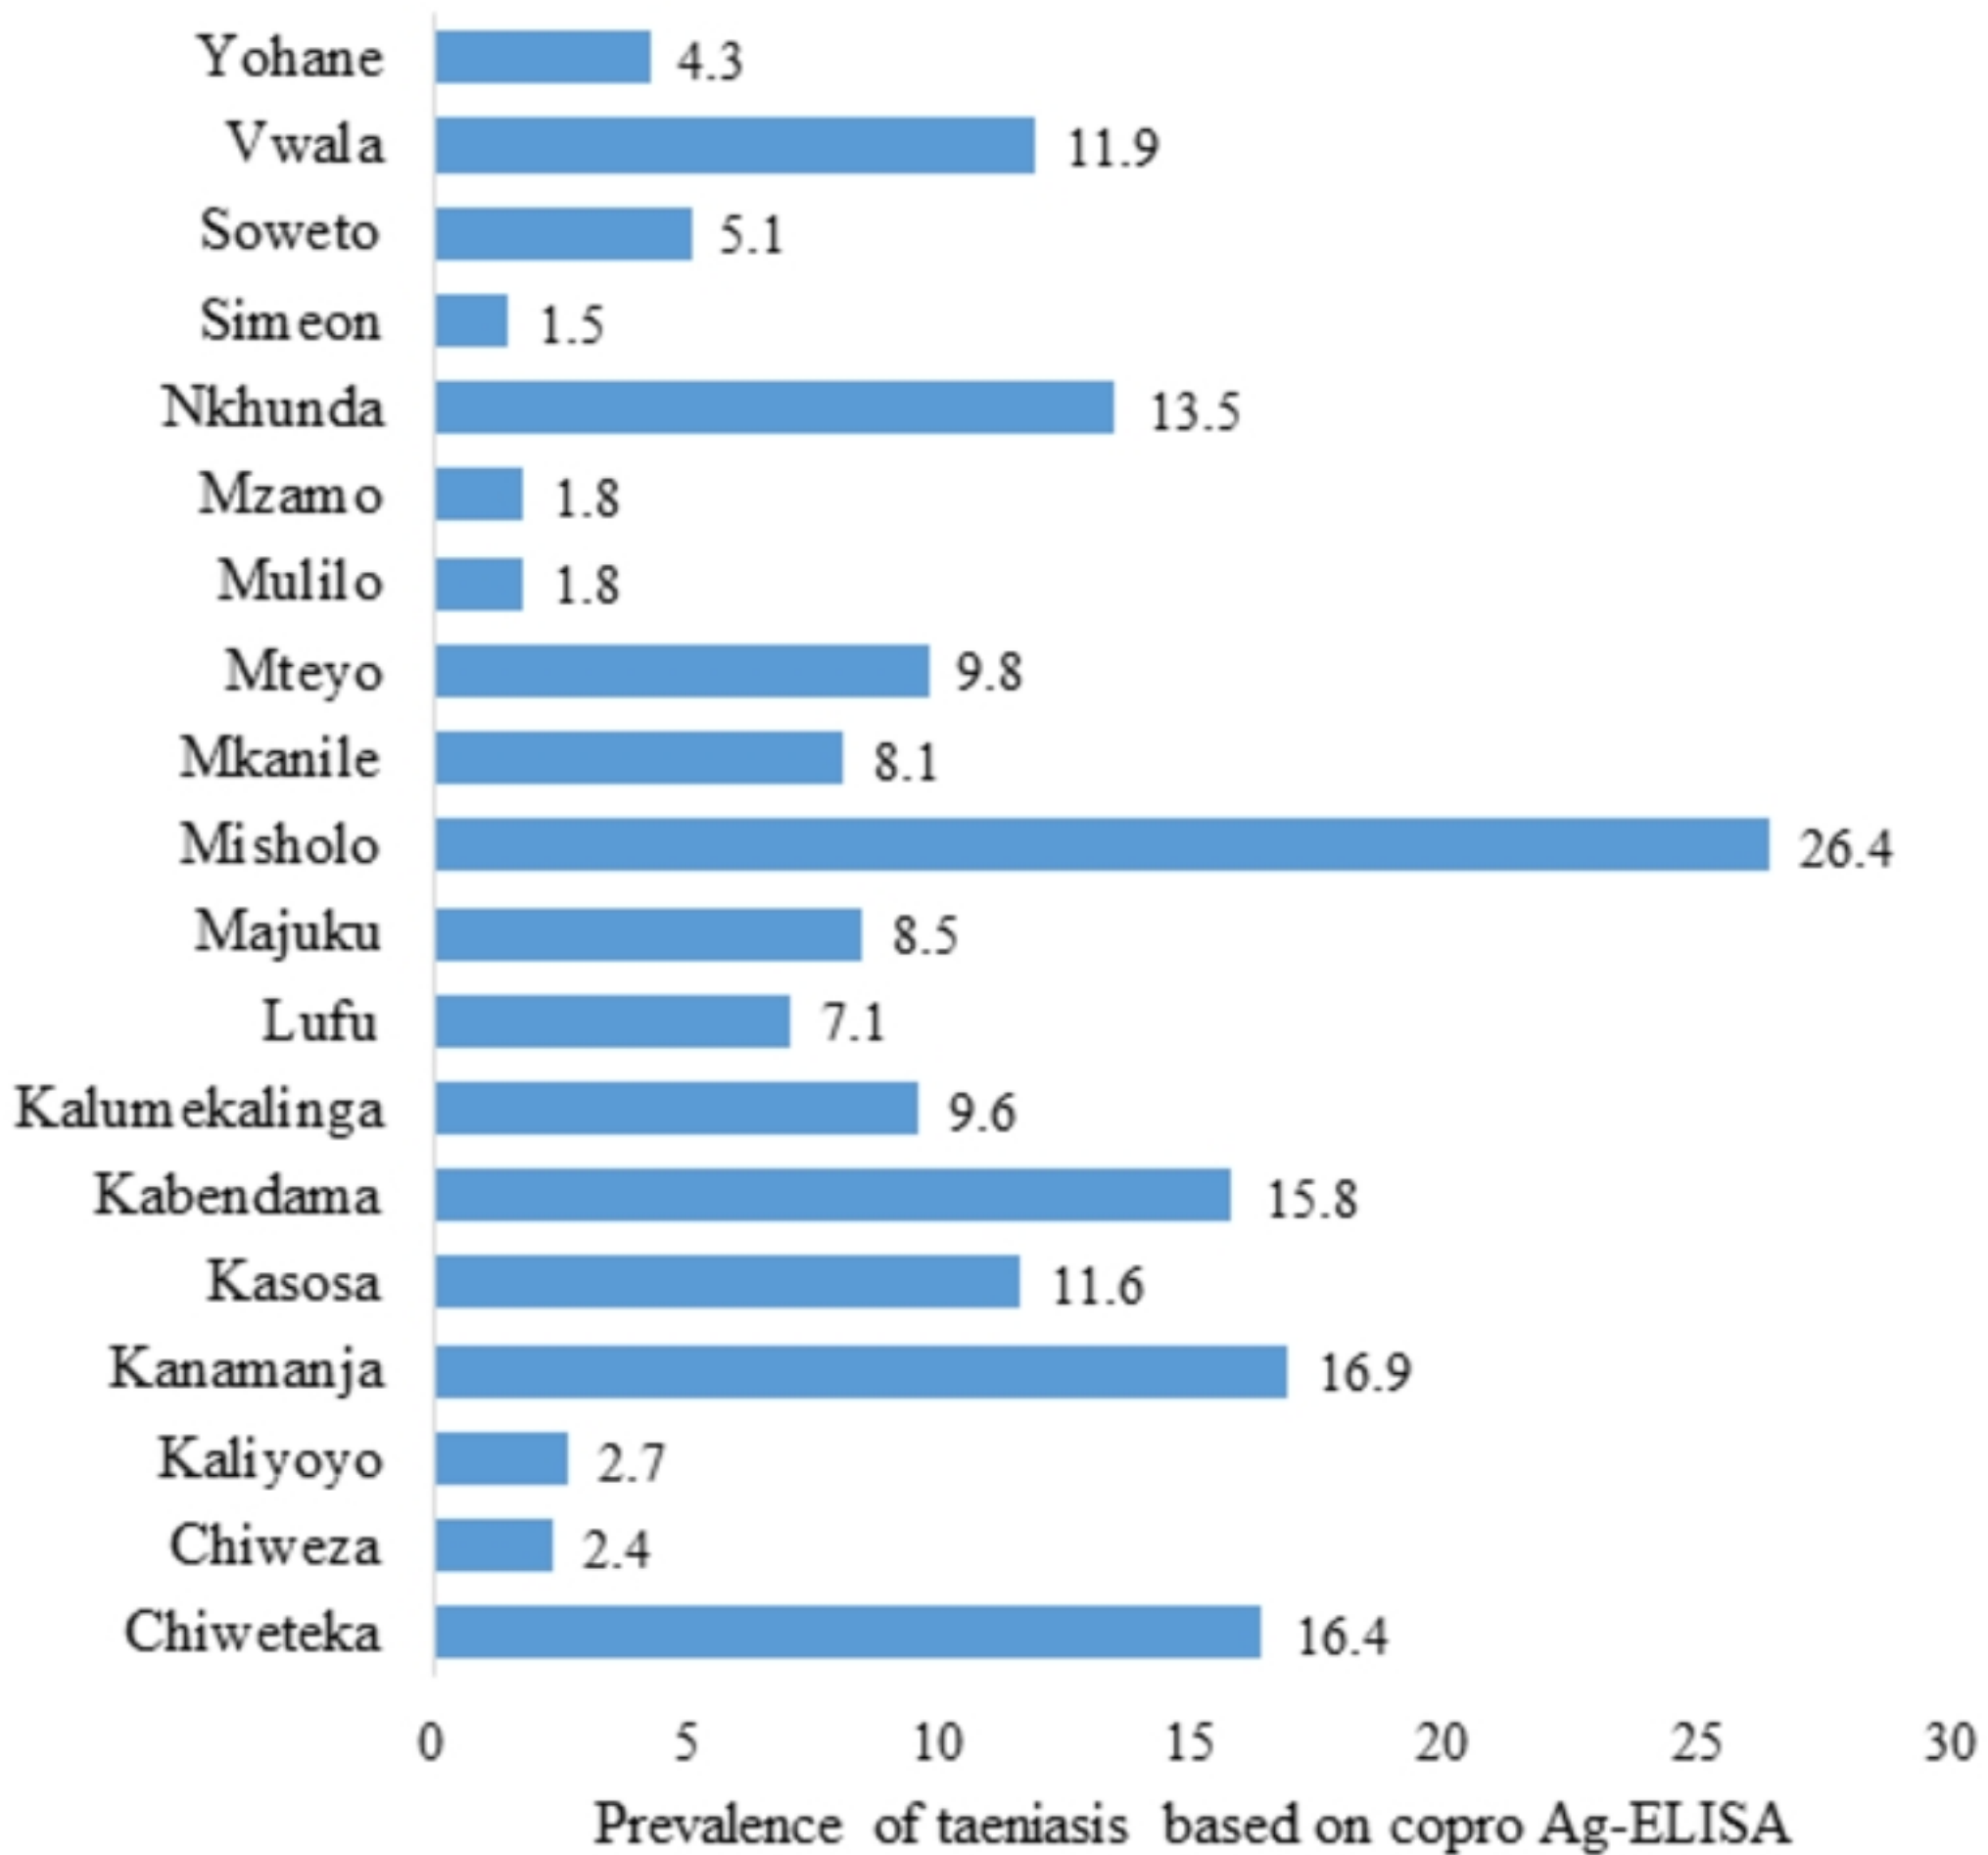

Fig 6
